1 **Co-evolutionary analysis suggests a role for TLR9 in papillomavirus restriction**

2

3 Kelly King<sup>1</sup>, Brendan B. Larsen<sup>2</sup>, Sophie Gryseels<sup>2,3,4</sup>, Cécile Richet<sup>5</sup>, Simona Kraberger<sup>5</sup>, Robert  
4 Jackson<sup>1</sup>, Michael Worobey<sup>2,6</sup>, Joseph S. Harrison<sup>7</sup>, Arvind Varsani<sup>5,8</sup>, Koenraad Van  
5 Doorslaer<sup>1,6,9\*</sup>

6

7 <sup>1</sup>School of Animal and Comparative Biomedical Sciences, University of Arizona, Tucson, AZ  
8 85721, USA

9 <sup>2</sup>Department of Ecology and Evolutionary Biology, University of Arizona, Tucson, Arizona 85721,  
10 USA.

11 <sup>3</sup>Department of Microbiology, Immunology and Transplantation, Rega Institute, KU Leuven, 3000  
12 Leuven, Belgium.

13 <sup>4</sup>Department of Biology, University of Antwerp, 2000 Antwerp, Belgium.

14 <sup>5</sup>The Biodesign Center for Fundamental and Applied Microbiomics, Center for Evolution and  
15 Medicine, School of Life Sciences, Arizona State University, Tempe, AZ 85287-5001, USA

16 <sup>6</sup>The BIO5 Institute, University of Arizona, Tucson, Arizona 85721, USA.

17 <sup>7</sup>Department of Chemistry, University of the Pacific, Stockton, California, USA.

18 <sup>8</sup>Structural Biology Research Unit, Department of Integrative Biomedical Sciences, University of  
19 Cape Town, Observatory, Cape Town 7701, South Africa

20 <sup>9</sup>Department of Immunobiology; Cancer Biology Graduate Interdisciplinary Program; UA Cancer  
21 Center, University of Arizona Tucson, AZ 85724, USA

22

23 \* Correspondence: [vandoorslaer@arizona.edu](mailto:vandoorslaer@arizona.edu)

24

25 **Keywords:** *Papillomaviridae*; Yinpterochiroptera; Yangochiroptera; Mexican free-tailed bat;  
26 innate immunity, TLR9

27 **A. Abstract**

28 Upon infection, DNA viruses can be sensed by pattern recognition receptors (PRRs) leading to  
29 the activation of type I and III interferons, aimed at blocking infection. Therefore, viruses must  
30 inhibit these signaling pathways, avoid being detected, or both. Papillomavirus virions are  
31 trafficked from early endosomes to the Golgi apparatus and wait for the onset of mitosis to  
32 complete nuclear entry. This unique subcellular trafficking strategy avoids detection by  
33 cytoplasmic PRRs, a property that may contribute to establishment of infection. However, as the  
34 capsid uncoats within acidic endosomal compartments, the viral DNA may be exposed to  
35 detection by toll-like receptor (TLR) 9. In this study we characterize two new papillomaviruses  
36 from bats and use molecular archeology to demonstrate that their genomes altered their  
37 nucleotide composition to avoid detection by TLR9, providing evidence that TLR9 acts as a PRR  
38 during papillomavirus infection. Furthermore, we demonstrate that TLR9, like other components  
39 of the innate immune system, is under evolutionary selection in bats, providing the first direct  
40 evidence for co-evolution between papillomaviruses and their hosts.

41 **B. Introduction**

42 Papillomaviruses (PVs) are circular double-stranded DNA viruses found in an extensive repertoire  
43 of hosts, including mammals, reptiles, birds, and fish (Van Doorslaer 2013; Van Doorslaer et al.  
44 2013; 2017; 2018). In humans, roughly 400 genetically diverse papillomavirus types have been  
45 described. While a subset of these viruses is associated with (malignant) tumors, most viral types  
46 do not cause disease in immunocompetent hosts. As with humans, hosts that have been  
47 thoroughly sampled are infected with an extensive repertoire of highly diverse yet species-specific  
48 viruses. Co-evolution of virus and host alone is insufficient to explain the phylogeny of viruses in  
49 the family *Papillomaviridae*. For example, papillomaviruses infecting humans do not form a  
50 monophyletic group, within the papillomavirus family member phylogenetic tree suggests multiple  
51 evolutionary mechanisms associated with host cellular interactions and immune evasion as

52 important factors throughout viral genome evolution (Van Doorslaer 2013; Willemsen and Bravo  
53 2019).

54 Furthermore, host or tissue tropism is likely a significant determinant of host-pathogen interactions  
55 (Carey et al. 2019; Sawyer, Emerman, and Malik 2004; Taubenberger and Kash 2010). Therefore,  
56 genomic analyses that consider essential mechanisms of the viral life cycle and evolutionary  
57 pressures related to host-parasite interactions may provide a novel perspective into  
58 papillomavirus genome evolution. A broader description of animal viruses will continue to inform  
59 these efforts.

60 A successful infection requires that the papillomavirus DNA is delivered to the host cell nucleus.  
61 Papillomaviruses access mitotically active basal cells through lesions in the stratified epithelia of  
62 cutaneous or mucosal tissues. Following binding to cellular receptors and priming by kallikrein-8  
63 and furin cleavage, the virus is endocytosed (Aksoy, Gottschalk, and Meneses 2017; Day and  
64 Schelhaas 2014; DiGiuseppe, Bienkowska-Haba, Guion, and Sapp 2017; Richards et al. 2006;  
65 Cerqueira et al. 2015; Day et al. 2013; Schelhaas et al. 2012). The viral DNA is transported to the  
66 Golgi before the mitosis-dependent nuclear accumulation of L2 and viral DNA near PML bodies  
67 (Day et al. 2013; Lipovsky et al. 2013; Popa et al. 2015; Aydin et al. 2017; 2014; Calton et al.  
68 2017; DiGiuseppe, Bienkowska-Haba, Guion, Keiffer, et al. 2017; Stepp et al. 2017; Day et al.  
69 2004).

70 Host cells detect a variety of viral pathogen-associated molecular patterns (PAMPs) by pattern-  
71 recognition receptors (PRRs), resulting in induction of interferon (IFN) and a potent antiviral  
72 response (Medzhitov 2007). The concerted actions of PRR signaling, specific viral-restriction  
73 factors, and viral evasion strategies determine the eventual outcome of viral infection (Bowie and  
74 Unterholzner 2008).

75 The papillomaviral structural proteins (L1 and L2) have no known enzymatic activity to directly  
76 counteract antiviral responses (Buck, Day, and Trus 2013; J. W. Wang and Roden 2013). Instead,  
77 we demonstrated that papillomaviruses evolved an elaborate trafficking mechanism to evade

78 PRR sensing pathways within the cytosol (Uhlorn, Gamez, et al. 2020; Campos 2017; Uhlorn,  
79 Jackson, et al. 2020). Furthermore, millions of years of virus-host co-speciation left historical  
80 evidence of immune evasion events in these viruses' genomes (Sorouri et al. 2020). For example,  
81 APOBEC3 has been demonstrated to restrict infection with HPV (Warren, Xu, et al. 2015; Warren,  
82 Van Doorslaer, et al. 2015). We previously demonstrated that alphapapillomaviruses are  
83 significantly depleted of TpC dinucleotides, the target for APOBEC3 mediated mutagenesis. This  
84 TpC depletion evolved as a mechanism to evade APOBEC3 mediated mutagenesis. Specifically,  
85 this depletion of the TpC content is more pronounced in mucosal alphapapillomaviruses and is  
86 correlated with significantly higher expression levels of APOBEC3 in mucosal tissues (Warren,  
87 Van Doorslaer, et al. 2015). These findings illustrate that host antiviral activity plays a critical role  
88 in regulating papillomavirus evolution and that “molecular archeology” can be used to identify  
89 these events.

90 Toll-like receptors (TLR) survey the extracellular and endosomal compartments and represent the  
91 first defense line against foreign invaders. TLR2 and TLR4 recognize viral glycoproteins (Blanco  
92 et al. 2010; Boehme, Guerrero, and Compton 2006; Jude et al. 2003; Bieback et al. 2002;  
93 Murawski et al. 2009; Rassa et al. 2002; M. R. Thompson et al. 2011); TLR3 recognizes double-  
94 stranded RNA (Alexopoulou et al. 2001; Bell et al. 2006; Gowen et al. 2006; Oshiumi et al. 2011;  
95 F. Weber et al. 2006; Choe 2005), TLR7 and TLR8 recognize viral single-stranded RNA (Akira,  
96 Uematsu, and Takeuchi 2006; Diebold 2004; Hemmi et al. 2002; Kawai and Akira 2006; Zucchini  
97 et al. 2008; Jurk et al. 2002; Heil 2004). The endosomal TLR9 detects unmethylated CpG motifs  
98 found in dsDNA (viral) genomes (Bowie and Unterholzner 2008; Gupta et al. 2015; M. R.  
99 Thompson et al. 2011; J. Thompson and Iwasaki 2008).

100 As described above, HPV particles are endocytosed (Campos 2017; Calton et al. 2017), and viral  
101 DNA could be recognized by endosomal TLR9 resulting in a downstream inflammatory immune  
102 response. We hypothesize that TLR9 may detect papillomavirus dsDNA leading to CpG depletion,  
103 similar to what we observed for APOBEC3 target motifs. Indeed, papillomavirus genomes have

104 reduced CpG content (Warren, Van Doorslaer, et al. 2015; Upadhyay and Vivekanandan 2015).  
105 This overall dinucleotide depletion confounds the ability to demonstrate the cause of this  
106 depletion.  
107 Bats serve as reservoirs for many viruses and have served as the source of well-documented  
108 cross-species transmission events of pathogens responsible for a myriad of epidemics, the most  
109 notable being severe acute respiratory syndrome coronavirus 1, middle east respiratory syndrome  
110 coronavirus, Ebola virus, Marburg virus, and most recently, severe acute respiratory syndrome  
111 coronavirus 2 (Banerjee et al. 2020; Brook and Dobson 2015; Wacharapluesadee et al. 2021). It  
112 has been proposed that bats avoid immunopathological outcomes by not fully clearing a viral  
113 infection (O’Shea et al. 2014). Indeed, bats have been reported to exhibit a ‘dampened’ immune  
114 response to viral infections (Banerjee et al. 2020; Gorbunova, Seluanov, and Kennedy 2020; Xie  
115 et al. 2018; Zhang et al. 2013; Subudhi, Rapin, and Misra 2019). The complex suppression of  
116 immune response pathways is variable between several bat species (order Chiroptera) (Zhang et  
117 al. 2013; Jiang et al. 2017; Escalera-Zamudio et al. 2015; Hawkins et al. 2019). Importantly, it  
118 was demonstrated that residues involved in the ligand-binding region of the bat TLR9 protein are  
119 evolving under positive selection (Escalera-Zamudio et al. 2015; Jiang et al. 2017). This  
120 evolutionary selection of TLR9 has been proposed to contribute to the high tolerance for viral  
121 infections observed in bats (Banerjee et al. 2020; Hawkins et al. 2019). Notably, the theory of co-  
122 evolution suggests that viruses need to counter these changes in TLR9, and we should be able  
123 to detect these host-parasite interactions (Tan et al. 2017; Warren, Van Doorslaer, et al. 2015).  
124 To address this question, we determined the genomes of two novel bat papillomaviruses from  
125 *Tadarida brasiliensis* (TbraPV2, TbraPV3). Taxonomically, bats are classified into two suborders;  
126 Yinpterochiroptera and Yangochiroptera. By comparing the genomes of papillomaviruses  
127 associated with bats from either suborder, we demonstrate that TLR9 target motifs are  
128 significantly depleted and impact papillomavirus evolution. Furthermore, we extend existing data  
129 showing that Yangochiroptera TLR9 is evolving under diversifying selection. This argues that

130 papillomavirus genomes are evolving in response to a host change. This is the first direct evidence  
131 of PVs evolving in response to host evolutionary changes, thus providing direct evidence for co-  
132 evolution. Also, these data argue that TLR9 is a restriction factor for papillomavirus infection.

133

## 134 **C. Results**

### 135 C1. Sampling, sample processing and viral metagenomics

136 We identified two circular contigs (circular based on terminal redundancy) that had similarities to  
137 papillomavirus sequences. We mapped the raw reads to the assembled genomes using BBmap  
138 (Bushnell 2014) to determine the read depth. For both the genomes we had a 22-25X coverage  
139 depth across the whole genome with 1200-1300 mapped reads.

140

### 141 C2. New bat associated papillomaviruses cluster with previously identified Chiropteran viruses

142 Using a metagenomics approach, we determined the genomes of two novel circular dsDNA  
143 viruses. The open reading frames of these putative new viruses were determined using PuMA  
144 (Pace et al., 2020). This analysis identified the typical papillomavirus open reading frames (E6,  
145 E7, E1, E2, L1, and L2) and the spliced E1<sup>E4</sup> and E8<sup>E2</sup> mRNAs), suggesting that we recovered  
146 the genomes of two papillomaviruses associated with Mexican free-tailed bats (*Tadarida*  
147 *brasiliensis*). The current papillomavirus taxonomy is based on sequence identity across the L1  
148 open reading frame. If two viruses share more than 60%, they fall into the same genus. Species  
149 within a genus group viral 'types' that share between 70 and 90% sequence identity. A new  
150 papillomavirus type shares less than 90% sequence identity with other viruses (Van Doorslaer et  
151 al. 2018; Bernard et al. 2010; de Villiers et al. 2004). Both identified viruses share less than 90%  
152 identity with their closest relatives (**Figure 1B**). In consultation with the international animal  
153 papillomavirus reference center (Van Doorslaer and Dillner 2019), we name these two novel  
154 papillomaviruses TbraPV2 (*GenBank* # MW922427) and TbraPV3 (*GenBank* # MW922428),  
155 respectively. TbraPV2 is 8093 bp long, while TbraPV3 is 8037 bp long. Based on pairwise

156 sequence identity in the L1 open reading frame, both viruses are most closely related to TbraPV1  
157 (**Figure 1B**). TbraPV2 shares 81.7% sequence identity with TbraPV1 and likely represents a new  
158 species in this as of yet unclassified genus. TbraPV3 shares 60.4% identity with TbraPV1, placing  
159 it in the same genus. However, the phylogenetic tree shown in **Figure 1** places TbraPV3 as an  
160 outgroup to a clade that contains HPV41, EdPV1, TbraPV1, TbraPV2. Therefore, the evolutionary  
161 history of these viruses does not support the current L1-based taxonomy.

162 It has been demonstrated that co-speciation between PVs and their hosts is a major contributor  
163 to the papillomavirus's evolutionary history (Van Doorslaer 2013; Gottschling et al. 2007; 2011).  
164 In support of this notion, these novel bat papillomaviruses cluster with other previously described  
165 Chiropteran papillomaviruses (**Figure 1A**). However, as for other papillomavirus-host  
166 relationships, bat-associated viruses are paraphyletic, suggesting that other evolutionary  
167 mechanisms like intra-host divergence or niche adaptation likely contribute to the papillomavirus  
168 phylogenetic tree (Buck et al. 2016; Van Doorslaer 2013).

### 169 C3. Chiropteran PVs co-speciated with their hosts

170 While TbraPV2 and TbraPV3 cluster together with several other Chiropteran viruses, the larger  
171 clade consists of viruses infecting a wide array of mammals (red arrow in **Figure 1A**). In addition  
172 to 6 species of Chiroptera, the subtree contains 16 host species classified in 5 mammalian orders.  
173 We wanted to compare the evolutionary history of these diverse viruses to their hosts. Due to  
174 intra-host divergence and niche adaptation, papillomaviruses infecting the same host can be  
175 found in multiple phylogenetic tree clades. To ensure that viruses with a similar tissue tropism  
176 and evolutionary history are compared, we extracted a subtree from the maximum likelihood tree  
177 (**Figure 2**) (Smeele et al. 2018). This clade contains the newly identified TbraPV2 and TbraPV3  
178 embedded within the largest monophyletic Chiroptera papillomavirus clade (red arrow in **Figure**  
179 **1A**). We used a tanglegram to address our hypothesis of virus-host co-evolution (**Figure 2A**). In  
180 this analysis, nodes in the host and virus phylogeny are rotated to optimize tip matching.  
181 Similarities between the host and virus phylogenetic relationships are indicated by parallel lines

182 linking the virus to its host in their respective trees. Conversely, mismatches in the evolutionary  
183 history of the host and the virus show overlapping connecting lines. While there are some  
184 overlapping connections between papillomaviruses and their hosts, most virus-host pairs support  
185 the idea of co-speciation.

186 To formally quantify the degree of co-speciation, we focused on two datasets. First, we used the  
187 phylogenetic tree shown in **Figure 2**. Because it was previously shown that members of the  
188 *Lambdapapillomavirus* genus co-evolve with their hosts (Rector et al. 2007), we also tested a  
189 smaller subtree to avoid skewing the results (indicated with the red arrow in **Figure 2**). The host  
190 and virus phylogenetic trees were compared using the Wasserstein distance, estimated to be  
191 0.205 and 0.284 for the larger and smaller datasets, respectively. A Wasserstein distance of 0  
192 indicates that both trees are topologically identical, while a value of 1 indicates complete lack of  
193 congruence between both trees (Lewitus and Morlon 2016). Therefore, the host tree predicts the  
194 virus tree, suggesting a role for co-speciation.

195 Also, we used the Procrustean Approach to Cophylogeny (PACo). This approach evaluates  
196 congruency between distance matrices for each virus and associated host phylogenies  
197 (Balbuena, Míguez-Lozano, and Blasco-Costa 2013; Hutchinson et al. 2017). The observed best-  
198 fit Procrustean super-imposition ( $1.08E5$  and  $3.22E4$  for the larger and smaller dataset,  
199 respectively; denoted by the red dotted line) lies outside of the 95% confidence interval of the  
200 ensemble of 1000 network randomizations in the null model (**Figures 2B and C**). Therefore, the  
201 data allow us to reject the null hypotheses that the papillomavirus host tree does not predict the  
202 virus tree and supports co-speciation as an important process for the evolution of this subclade  
203 of PVs and their hosts (Balbuena, Míguez-Lozano, and Blasco-Costa 2013; Hutchinson et al.  
204 2017).

#### 205 C4. *Yangochiropteran viruses have a reduced CpG content.*

206 We previously demonstrated that millions of years of virus-host co-speciation left historical  
207 evidence of this virus-host arms-race in the papillomavirus' genomes. For example, the mucosal,



208 cancer-causing alphapapillomaviruses have a reduced TpC dinucleotide content, presumably due  
209 to evolutionary adaptations to APOBEC3 editing (Warren, Van Doorslaer, et al. 2015). To extend  
210 these studies, we calculated the observed/predicted ratio for each dinucleotide in the viruses  
211 shown in **Figure 2**. A ratio close to 1 indicates that a dinucleotide is seen in the sequence as often  
212 as expected based on each sequence's nucleotide composition. Values lower than 1 suggest that  
213 a dinucleotide is depleted. While the ApC, ApT, GpT, TpA, and TpC ratios are significantly lower  
214 than 1 (one-sample t-test p-value < 0.001), we observed the most significant decrease in the CpG  
215 dinucleotide ratio (**Figure 3**). The median CpG content for these evolutionarily related viruses is  
216 0.46. However, we noticed that the distribution has a long tail towards even lower values,  
217 suggesting that some viruses have a further reduced CpG content (**Figure 3**).

218 When we plotted the CpG ratio for each virus on a phylogenetic tree (**Figure 4A**), it became clear  
219 that the genomes of a subset of bat-associated papillomaviruses have a further decreased CpG  
220 content. The order Chiroptera consists of two suborders, Yinpterochiroptera and Yangochiroptera  
221 (Lei and Dong 2016; Teeling et al. 2002; Springer et al. 2001). When we associated the viruses  
222 with their Yinpterochiroptera and Yangochiroptera hosts, the data demonstrates that the  
223 Yangochiropteran papillomavirus genomes have even lower CpG values (orange bars in **Figure**  
224 **4A**) when compared to the Yinpterochiroptera and other related papillomaviruses in the same  
225 phylogenetic clade (blue bars) and members of a closely related clade (grey bars). Indeed, when  
226 combined, the Yangochiropteran papillomavirus genomes have a significantly reduced CpG ratio  
227 when compared to the other groups (**Figure 4B** ANOVA with posthoc Tukey test).

228 This reduction in the CpG ratio could be due to an overall lower GC content. We compared the  
229 CpG ratio to total genomic GC content (**Figure 4C**). This analysis demonstrates that there is no  
230 correlation between the decreased CpG ratio and the total GC content (linear regression:  $R^2 =$   
231 0.008, p-value = 0.27), and the reduced CpG ratio is not simply due to a lower GC content.

232 The viruses infecting bats in the Yangochiroptera suborder have a reduced CpG content, raising  
233 the possibility that the host species is influencing the CpG ratio and evolutionary trajectory of  
234 these viruses.

235 C5. CpG depletion alters codon usage without changing amino acid composition.

236 The CpG dinucleotide is present in 8 codons coding for five different amino acids. Therefore,  
237 reducing CpG dinucleotides is expected to lead to a bias in codon usage or amino acid  
238 composition. Roughly 85% of the papillomavirus genome codes for viral proteins (Van Doorslaer  
239 et al. 2013; 2017). The viral genome contains several overlapping ORFs (Van Doorslaer 2013;  
240 Van Doorslaer and McBride 2016). In some cases, this is a short overlap between the 3' end of  
241 one ORF and the 5' end of the downstream ORF (e.g., E6 and E7). In other cases, one ORF is  
242 wholly embedded within the coding region of another ORF (e.g., E4 embedded in E2, or E8 within  
243 E1). Since these overlapping regions are evolutionarily constrained at multiple codon positions  
244 (i.e., codon position 3 in frame 1, would be codon position 2 in the overlapping frame (Miyata and  
245 Yasunaga 1978), these overlapping regions were removed from the data (Materials and  
246 Methods).

247 We determined codon usage tables for the non-overlapping coding sequences for each of the  
248 papillomaviruses in the subtree described in **Figure 2**. These codon usage tables were compared  
249 using the Emboss 'codcmp' tool to calculate codon usage differences. The more diverse the  
250 codon usage, the larger the differences between both tables. This analysis shows that compared  
251 to each other, the Yangochiroptera papillomaviruses codon usage is more similar than when other  
252 viruses are compared (**Figure 5A**). This suggests that the reduction in CpG leads to a more  
253 restricted availability of codons. The relative synonymous codon usage (RSCU) value is the ratio  
254 of the observed frequency of one specific synonymous codon to the expected frequency (i.e., no  
255 codon usage bias). This ratio is an important measure of codon usage bias (Sharp, Tuohy, and  
256 Mosurski 1986). RSCU values higher than 1.6 and lower than 0.6 indicate overrepresented and  
257 underrepresented codons, respectively (Wong et al. 2010). CpG containing codons (underlined)

258 are significantly underrepresented in this dataset. For most amino-acids, CpG containing codons  
259 are further reduced in the Yangochiroptera papillomaviruses. Of note, in the case of arginine, the  
260 CpG containing codons are statistically significantly depleted when compared to the related  
261 viruses (**Figure 5C**). Since these codons' CpGs are located in the 1<sup>st</sup> and 2<sup>nd</sup> position of the codon,  
262 this depletion suggests that non-silent mutations are evolutionarily preferred over maintaining a  
263 relatively high CpG content. Of note, despite the biased codon usage, there is no change in the  
264 amino acid composition of the different viral proteins (**Figure 5B**). Thus, despite reducing CpG  
265 content, the Yangochiroptera papillomaviruses are likely coding for similar proteins. These  
266 observations likely explain the more restricted codon usage seen in **Figure 5A**.

#### 267 C6. Natural selection in the TLR9 of *Yangochiroptera* bats.

268 Specific residues within the Chiropteran TLR9 have been demonstrated to be under positive  
269 selective pressure (Escalera-Zamudio et al. 2015; Jiang et al. 2017). To determine whether  
270 diversifying selection differentially affected Yangochiroptera and Yinpterochiroptera TLR9, we  
271 constructed a maximum likelihood phylogenetic tree. As was previously reported, bat TLR9  
272 sequences formed a monophyletic clade separate from other eutherian sequences (data not  
273 shown), not as a sister-group to carnivores, ungulates, and cetaceans as is seen for other proteins  
274 (Tsagkogeorga et al. 2013). We used RELAX (Wertheim et al. 2015), adaptive Branch Site  
275 Relative Effect Likelihood (Smith et al. 2015), and Fixed effect Likelihood tests (Kosakovsky Pond  
276 and Frost 2005) to detect evidence for evolutionary selection (materials and methods). RELAX  
277 demonstrated that evolutionary selection intensified ( $K = 6.07$ ;  $LR = 21.05$ ) within the  
278 Yangochiroptera compared to the Yinpterochiroptera. Furthermore, aBSREL recovered evidence  
279 for episodic diversifying selection on the branches leading to the Yangochiroptera (**Figure 6B**).  
280 Finally, FEL identified 7 sites under diversifying selection within the Yangochiroptera.  
281 We mapped a subset of these residues as well as residues previously identified to be under  
282 diversifying selection (Escalera-Zamudio et al. 2015), and sites shown to be functionally important  
283 for target recognition (Ohto et al. 2015) onto the structure of TLR9 bound to target DNA (**Figure**

284 **6A)**. Many of the sites are highly variable when compared to the mammalian consensus (**Figure**  
285 **6B)**. Notably, there are apparent differences between the TLR9 sequence of Yangochiroptera  
286 and Yinpterochiroptera, specifically within the DNA recognition motif. *In silico* mutation analysis  
287 suggests that these Yangochiroptera specific changes would alter how TLR9 recognizes its target  
288 DNA. Overall, these mutations lead to a reduction in the positive surface charge of TLR9. Within  
289 the Yangochiroptera, K51T leads to the loss of an ionic interaction with the phosphate backbone.  
290 The Arg at position 76 is much larger than the canonical His at this position, which will presumably  
291 impact the interaction with the DNA. While the P105 residue Vanderwaals bonds with the C6 and  
292 T9 residues in the crystalized DNA, the I105 is too bulky to occupy the same conformation as the  
293 proline and will likely lead to a loss of the observed bend in the protein at this position. K181 is  
294 involved in ionic interactions with the DNA backbone. Q181 has no charge and is too short to  
295 interact with the DNA sidechain. E181 will likely charge repel the DNA backbone. Finally, K292  
296 interacts with the DNA backbone, but this interaction is absent in Yangochiroptera TLR9 due to  
297 the Ser residue at this position. Overall, the Yangochiroptera TLR9 DNA binding domain is  
298 predicted to be functionally different from the Yinpterochiroptera and the other mammalian TLR9  
299 molecules.

### 300 C7. CpG depletion points toward a TLR9 signature

301 Our data demonstrate that the Yangochiroptera TLR9 protein is under selective pressure, and  
302 papillomaviruses that infect these hosts have a decreased CpG content. We hypothesized that  
303 DNA recognition by TLR9 would lead to a decrease in CpG in the context of a TLR9 specific  
304 PAMP. Thus, a specific (set of) tetramers should be depleted within the Yangochiroptera. We  
305 calculated the observed/expected ratio for all tetramers and focused on those tetramers with a  
306 central CpG (NCGN; **Figure 7A**). This initial analysis indicates that ACGT, GCGT, TCGA, and  
307 TCGT are diminished in Yangochiroptera. We calculated the average tetramer ratio for each  
308 group of viruses to normalize for the differences in overall CpG content between Yangochiroptera  
309 and other viruses, as in **Figure 4**. We compared the proportion of Yang to Yin, Yang to other, and

310 Yin to other (**Figure 7B**) for each tetramer. For example, in Yangochiroptera papillomaviruses,  
311 'ACGT' is depleted three- to four-fold compared to other (brown) or Yinpterochiroptera  
312 papillomaviruses (orange bar), respectively. Conversely, this tetramer is not depleted when  
313 Yinpterochiroptera and other viruses are compared (blue bar). As expected, CpG containing  
314 tetramers are depleted in Yangochiroptera papillomaviruses. Using a bootstrap method based on  
315 1000 randomly shuffled sequences (Materials and Methods), the 'ACGT' tetramer was identified  
316 as significantly depleted within Yangochiroptera specific viruses (**Figure 7C**). This tetramer is  
317 identical to the experimentally validated core mouse TLR9 recognition motif but is different from  
318 the human TLR9 PAMP (TCGT) (Pohar et al. 2015; Krieg et al. 1995; Yi et al. 1998; G. Sen et al.  
319 2004; Hartmann and Krieg 2000). This suggests that papillomaviruses associated with  
320 Yangochiroptera specifically deplete CpG dinucleotides in the context of a known TLR9 PAMP.

## 321 **D. Discussion**

322 The data presented here advance our understanding of papillomavirus evolution and host-  
323 pathogen interactions. Specifically, we provide evidence that papillomavirus genomes have  
324 evolved to avoid detection by TLR9. The implications of this finding for papillomavirus biology are  
325 discussed below.

### 326 **D1. Viruses infecting bats in the suborder Yangochiroptera deplete CpG in a TLR9** 327 **dependent manner.**

328 We demonstrate that the genomes of viruses isolated from specific bat species have a highly  
329 reduced CpG content. A significant reduction of CpG sites in papillomavirus genomes has been  
330 previously documented (Warren, Van Doorslaer, et al. 2015; Upadhyay and Vivekanandan 2015).  
331 However, the reason for this depletion is unclear. Of note, in mammalian genomes, CpGs are  
332 rare outside of so-called CpG islands (Illingworth and Bird 2009). This is believed to be mainly  
333 due to the observation that methylated CpGs are prone to deamination, resulting in C → T  
334 mutations, leading to a depletion of CpG sites in the mammalian genomes over evolutionary time.

335 Our data in **Figure 3** show an increase in TpG and CpA. However, this increase does not appear  
336 to be of the same magnitude as the dramatic reduction in CpG seen in the same dataset.  
337 The zinc-finger antiviral protein (ZAP) acts as a broad-spectrum antiviral restriction protein that  
338 recognizes CpG rich viral RNA, leading to RNA degradation and inhibition of translation (Gao  
339 2002). Interestingly, it appears that ZAP exploits host CpG suppression to identify non-self RNA.  
340 This may explain why multiple RNA viruses have reduced CpG content (Cheng et al. 2013;  
341 Greenbaum et al. 2008), independently from CpG methylation as described above (Takata et al.  
342 2017). ZAP was recently shown to restrict the replication of vaccinia virus Ankara (Peng et al.  
343 2020) and HCMV (Lin et al. 2020), demonstrating that ZAP recognizes CpG rich viral RNA and  
344 can restrict CpG rich DNA viruses. However, papillomavirus genomes are generally CpG depleted  
345 (Warren, Van Doorslaer, et al. 2015; Upadhyay and Vivekanandan 2015). Furthermore, the  
346 consensus recognition site for murine ZAP was identified as CN<sub>7</sub>GNCG. In this motif, the CG  
347 dinucleotide acts as the essential element, while the G further enhances binding affinity 10-fold  
348 (Luo et al. 2020). Our tetramer analysis does not identify a downregulation of GNCG in  
349 Yangochiroptera specific papillomaviruses (data not shown). Therefore, it appears unlikely that  
350 ZAP plays a vital role during papillomavirus infection. However, this would need to be  
351 demonstrated experimentally.

352 In contrast, we provide evidence that the depletion of CpG in papillomavirus genomes is, at least  
353 in part, due to the need to avoid detection by TLR9. Unmethylated CpG DNA motifs are  
354 recognized by TLR9, leading to an interferon and inflammatory cytokine-mediated antiviral  
355 response (Kawai and Akira 2006). By carefully analyzing the CpG content of related Chiropteran  
356 papillomaviruses, we demonstrate that viruses isolated from Yangochiroptera have a further  
357 decreased CpG content. Importantly, we demonstrate that the Yangochiroptera TLR9 protein is  
358 evolving under diversifying selection, specifically sites implicated in DNA recognition. Finally, by  
359 analyzing tetramer motifs, we show that Yangochiroptera are specifically depleted in ACGT, a  
360 known TLR9 recognition motif. Together these data demonstrate that Yangochiroptera

361 papillomaviruses deplete CpG, in the context of a TLR9 recognition motif, presumably in response  
362 to evolutionary changes within the TLR9 protein. This has important implications for  
363 papillomavirus biology and evolution.

## 364 **D2. Recognition of papillomavirus DNA in the endosomes during infectious entry**

365 Shortly after entry, papillomavirus virions are trafficked from early endosomes into acidic late  
366 endosome and multivesicular bodies, leading to capsid disassembly and uncoating viral DNA  
367 (Campos 2017). Presumably, this exposes the viral DNA to TLR9, leading to an antiviral  
368 response. Importantly, TLR9 specifically recognizes unmethylated CpG motifs. Several studies  
369 have investigated the methylome of oncogenic human papillomaviruses (Johannsen and Lambert  
370 2013). While these studies have demonstrated that the viral DNA is methylated under specific  
371 conditions, it is unknown whether the packaged viral genome contains methylated CpG sites.  
372 However, we have some clues that would suggest that viral DNA inside the virion is likely  
373 hypomethylated. DNA methyltransferase 1 (DNMT1) is the primary cellular enzyme responsible  
374 for maintaining DNA methylation patterns after replication. The DNMT1 protein was found  
375 enriched in undifferentiated cells and is reduced as cells differentiate (G. L. Sen et al. 2010, 1).  
376 Therefore, it is likely that the reduction in DNMT1 levels will lead to a loss of methylation on the  
377 viral genomes destined for packaging and infection of the new tissue.

378 Differentially methylated CpG dinucleotides are present within consensus E2 binding sites in the  
379 viral upstream regulatory region (McBride 2013). The binding of E2 to these binding sites is  
380 important for viral replication, transcription, and proper partitioning of the viral genomes to  
381 daughter cells (McBride 2013). In many viruses, the full-length E2 protein either activates or  
382 represses viral transcription in a dose-dependent manner (Bouvard et al. 1994; Fujii et al. 2001;  
383 Thierry and Yaniv 1987; Steger and Corbach 1997). CpG methylation of these sites inhibits E2  
384 binding, presumably altering E2-mediated control of E6/E7 oncogene expression (Thain et al.  
385 1997; Vinokurova and von Knebel Doeberitz 2011). However, the impact of changes to E2BS  
386 methylation during cellular differentiation is not understood (Burley, Roberts, and Parish 2020).

387 Nonetheless, studies using HPV16 containing cells suggest that the viral URR is hypomethylated  
388 upon cellular differentiation (Kim et al. 2003).

389 A recent study showed that papillomavirus virions package DNA with histones enriched in  
390 modifications typically associated with “active” (Porter et al. 2021). Of interest, the authors  
391 demonstrate that the levels of H3K4me3 were enriched on virions, compared to cellular controls  
392 Conversely, virions were depleted in H3K9me3 (Porter et al. 2021). There is emerging evidence  
393 of active associations between histone lysine methylation and DNA methylation (Rose and Klose  
394 2014). For example, MeCP2 binds to methylated CpG (Nan et al. 1998), recruits the Suv39h1/2  
395 histone methyltransferases (Fuks 2003), increasing H3K9me marks (Fuks 2003; Lunyak 2002).  
396 In parallel, the H3K9me mark recruits Dnmt3a/b to heterochromatin, leading to *de novo*  
397 methylation of CpG sites (Lehnertz et al. 2003; Otani et al. 2009). Since H3K9me3 is depleted in  
398 virions, it is tempting to conclude that virion DNA will be hypomethylated. Furthermore, H3K4me3  
399 appears to be mutually exclusive with DNA methylation (M. Weber et al. 2007). H3K4me3 serves  
400 as a binding site for H3K9me2 demethylases (Horton et al. 2010), which would lead to loss of  
401 DNA methylation. Since virion DNA is enriched for H3K4me3, this further strengthens the  
402 hypothesis that viral DNA would be depleted in DNA methylation. Therefore, it seems reasonable  
403 to assume that infecting the virus genome will be hypomethylated and therefore serve as a TLR9  
404 PAMP.

405 As mentioned, recognition by TLR9 would lead to an antiviral response. Indeed, siRNA-mediated  
406 knock-down of TLR9 has been shown to dramatically upregulate viral copy number and  
407 transcription following infection with HPV16 (Hasan et al. 2013), suggesting that TLR9 can restrict  
408 HPV infection. The observation that despite a reduction in viral CpG, HPV16 infection is still  
409 improved by interfering with TLR9 (signaling) demonstrates an important rule in host-pathogen  
410 interactions. While the loss of all (unmethylated) CpG dinucleotides would avoid detection by  
411 TLR9, the virus can likely not completely remove all CpGs from its genome. The virus and the  
412 host establish an uneasy balance.



### 413 **D3. Sustained flight and the bat immune system**

414 Members of Chiroptera are classified into two suborders – Yinpterochiroptera (Rhinolophoid and  
415 megabats) and Yangochiroptera all other bat species (Lei and Dong 2016; Teeling et al. 2002;  
416 Springer et al. 2001). These suborders diverged roughly 60 million years ago (Lei and Dong  
417 2016). Interestingly, the Yangochiroptera evolved flight and echolocation simultaneously, while  
418 the Yinpterochiroptera evolved these features separately (Anderson and Ruxton 2020). Sustained  
419 flight necessitated an increased metabolic capacity (Shen et al. 2010), which required bats to  
420 accommodate oxidative metabolism by-products such as DNA damage (Barzilai 2002). Indeed,  
421 many genes involved in DNA damage response and immunity have been demonstrated to be  
422 under positive evolutionary selection (Hawkins et al. 2019; Zhang et al. 2013). Since both  
423 suborders of bats 'invented' flight independently, likely, the corresponding adaptations are also  
424 different. Indeed, we and others show that TLR9 is also under diversifying selection, specifically  
425 in the Yangochiroptera. While TLR9 likely did not evolve specifically to restrict papillomavirus  
426 infections, the virus likely needs to minimize its CpG content.

### 427 **D4. Direct evidence of co-evolution between the virus and its hosts**

428 Co-evolution alongside their hosts has been suggested to be an essential factor in the evolution  
429 of papillomaviruses (Rector et al. 2007; Van Doorslaer 2013). However, the evolutionary history  
430 of PVs is complex. PVs isolated from fish form a monophyletic group distinct from those from  
431 mammals. However, within the mammalian papillomaviruses, there is no strict codivergence  
432 pattern that would unambiguously indicate an ancient relationship between host and virus. There  
433 has been no direct evidence in favor of co-evolution between papillomaviruses and their hosts.  
434 The co-evolution theory would predict that the virus would need to adapt when the host evolves  
435 a new skill. Therefore, as TLR9 evolves new functionalities, the virus would need to respond to  
436 preserve the balance between virus and host. Indeed, our data suggest that as Yangochiroptera  
437 TLR9 is undergoing diversifying selection, papillomavirus genomes infecting these bats further

438 depleted their CpG content, specifically in the context of a known TLR9 PAMP. This is the first  
439 direct evidence of co-evolution between this family of viruses and their hosts.

440 In the phylogenetic analysis, the viruses that infect Yinpterochiroptera *and* Yangochiroptera,  
441 respectively, are not monophyletic but rather are present in three mixed clades (**Figure 2**; EsPV1,  
442 EsPV3, and RfPV1; MscP2 and EhPV1; TbraPV1-3). This suggests that these three main clades  
443 diverged before the ancestor of Yinpterochiroptera *and* Yangochiroptera split over 65 million years  
444 ago. As these ancestral viruses co-evolved with the Yangochiroptera hosts, they selected for loss  
445 of CpG. This occurred at least three separate times in the evolution of Yangochiroptera viruses.  
446 This strongly argues against a founder effect but in favor of recurring co-evolutionary interactions.

#### 447 **D5. Immune evasion by nucleotide sequence editing**

448 We previously used computer modeling and reconstruction of ancestral alphapapillomavirus  
449 genomes to show that these viruses depleted CpG depletion to allow for replication in tissues with  
450 high APOBEC3 expression – presumably to evade restriction by APOBEC3 by selecting for  
451 variants that contain reduced target sites in their genomes. We observed a similar correlation  
452 between TLR9 and CpG depletion, strengthening the notion that papillomaviruses avoid detection  
453 by the immune system by changing the nucleotide composition of their genomes without  
454 dramatically changing the protein-coding ability. This strategy likely allows the virus to maintain  
455 its core functionalities. Most viral proteins are multifunctional and interact with a plethora of host  
456 proteins. Amino acid level changes would likely disrupt these functions. The *de novo* evolution of  
457 new proteins is rare and is further complicated by the small genome size and overlapping open  
458 reading frames (Van Doorslaer and McBride 2016; Willemsen and Bravo 2019, 5).

#### 459 **D6. Oncogene mediated reduction of TLR9.**

460 We propose that HPVs evade detection by TLR9 in the endosome by depleting CpG dinucleotides  
461 from their genomes. Interestingly, the E6 and E7 oncoproteins of different human  
462 papillomaviruses have been shown to downregulate the expression of TLR9 (Hasan et al. 2013;  
463 2007; Pacini et al. 2015; 2017). Importantly, E6 and E7 are not delivered to the cell during infection

464 but require onset of viral transcription after the viral genome is delivered to the nucleus and  
465 presumably has already been sensed in the endosome. This implies that the ability to degrade  
466 TLR9 may serve an additional function during the viral lifecycle, independent of initial infection.  
467 This idea is supported by the observation that other viruses (Merkel Cell Polyomavirus, Hepatitis  
468 B, and EBV) also interfere with TLR9 function during the maintenance phase of the infection  
469 (Fathallah et al. 2010; Vincent et al. 2011; Shahzad et al. 2013). Nonetheless, this oncogene-  
470 mediated repression of TLR9 occurs after infection and would still necessitate that the virus  
471 evades detection during infectious entry.

## 472 **D7. Conclusion**

473 In conclusion, phylogenetic and genomic analyses of novel bat-associated viruses TbraPV2 and  
474 TbraPV3 demonstrate that host-virus interaction, specifically evasion of the innate immune  
475 system, affects the evolution of papillomaviruses. These data suggest that TLR9 acts as a  
476 restriction factor for papillomavirus infection. Furthermore, we provide the first direct evidence for  
477 co-evolution between papillomaviruses and their hosts.

## 478 **E. Materials and Methods**

### 479 **E1. Data and Code availability**

480 We retrieved full-length reference sequences from the PV database (PaVE; [pave.niaid.nih.gov](http://pave.niaid.nih.gov)).  
481 Data and code for all analyses is available from <https://github.com/KVDlab/King-2021>. TbraPV2  
482 (MW922427) and TbraPV3 (MW922428) sequences are available on GenBank. Raw sequencing  
483 data is available on SRA (PRJNA718335).

### 484 **E2. Sampling and sample processing**

485 Bats were captured in mist nets set over water sources, extracted from the nets and put in brown  
486 paper bags. Bats were held in bags for 20 minutes, removed, and then measured and weighed.  
487 Individuals were identified to species in the field using metrics such as forearm length and weight.  
488 Feces and urine were collected from the bag or swabbed directly off the bat using a PurFlock  
489 0.14" Ultrafine swab (Puritan, Guilford, Maine). All feces and urine samples were put into tubes

490 containing 0.5 mL buffer consisting of 1x PBS and 50% Glycerol. These samples were held on  
491 ice until returning to the lab where they were stored in a -80°C freezer. All applicable international,  
492 national and institutional guidelines for the care and use of animals were followed during  
493 sampling. The study was approved by the University of Arizona Institutional Animal Care and Use  
494 Committee permit #15-583. Permits from the Arizona Department of Game and Fish were  
495 numbered SP506475.

496 Of each of the fecal samples, 5 g was homogenized in SM buffer and the homogenate was  
497 centrifuged at 6000 × g for 10 min. The supernatant was sequentially filtered through 0.45 µm  
498 and 0.2 µm syringe filters and viral particles in the filtrate were precipitated with 15% (w/v) PEG-  
499 8000 with overnight incubation at 4 °C followed by centrifugation at 10,000 ×g as described  
500 (Payne et al. 2020). The pellet was resuspended in 500µL of SM Buffer and 200µL of this was  
501 used for viral DNA extraction using the High Pure Viral Nucleic Acid Kit (Roche Diagnostics,  
502 Indianapolis, IN, USA). The total DNA was amplified using rolling circle amplification (RCA) with  
503 the TempliPhi 2000 kit (GE Healthcare, USA) and the RCA products used to prepare Illumina  
504 sequencing libraries then sequenced at Novogene Co. Ltd. (Hong Kong) on an Illumina NovaSeq  
505 6000. The paired-end raw reads were trimmed using default settings within Trimmomatic v0.39  
506 (Bolger, Lohse, and Usadel 2014) and the trimmed reads were *de novo* assembled using k-mer  
507 values of 33, 66, and 77 within metaSPAdes v 3.12.0 (Bankevich et al. 2012). The resulting  
508 contigs greater than 500 nucleotides were analyzed by BLASTx (Altschul et al. 1990) against a  
509 local viral protein database constructed from available NCBI RefSeq viral protein sequences  
510 (<https://ftp.ncbi.nlm.nih.gov/refseq/release/viral/>).

### 511 **E3. Calculation of nucleotide frequencies**

512 To determine a single observed vs. expected (O/E) dinucleotide ratio across the entire viral  
513 genome, a custom python script was used that leverages the CompSeq program from Emboss  
514 (Warren, Van Doorslaer, et al. 2015). The expected frequencies of dinucleotide ‘words’ were

515 estimated based on the observed frequency of single bases in the sequences. Only the forward  
516 frame was analyzed.

517 The tetramer content for each genome was calculated as described for the dinucleotides. To  
518 normalize tetramer content across groups of viruses we calculated the average O/E ratio across  
519 the different groups. These average O/E ratios were compared as indicated in the figure legends.  
520 To test whether any of the tested tetramers depletions are statistically significant, we randomly  
521 shuffled each viral genome. To ensure that each randomly shuffled sequence would maintain the  
522 same dinucleotide ratio as the original sequence, we used the Altschul and Erickson algorithm  
523 (Stephen F Altschul and Erickson Bruce W 1985) as implemented by Clote and colleagues (Clote  
524 2005). Based on these shuffled sequences, we calculated the above  
525 Yangochiroptera/Yinpterochiroptera ratio. This was repeated 1000 times to establish a null  
526 distribution. The 1-percentile was used as a significance cutoff.

#### 527 **E4. Phylogenetic analyses**

528 Annotated sequences (n = 409) were downloaded from the PaVE genome database. A maximum  
529 likelihood phylogenetic tree was constructed as described (King and Van Doorslaer 2018). The  
530 amino-acid sequences for E1, E2, and L1 of all known papillomaviruses and the new TbraPV2  
531 and TbraPV3 were individually aligned in MAFFT v7.3 (Kato 2002; 2005) using the L-INS-I  
532 algorithm. A partitioning scheme for the concatenated E1-E2-L1 alignment was determined under  
533 corrected Akaike information criterion (AICc) implemented in PartitionFinder2 (Lanfear et al.  
534 2017), which separately identified each gene to evolve under the LG+I+G+F evolutionary  
535 substitution model. The concatenated E1-E2-L1 alignment was used to infer the best maximum  
536 likelihood (ML) phylogenetic tree using RAxML-HPC v.8 (Stamatakis 2014) on CIPRES science  
537 gateway (Miller, Pfeiffer, and Schwartz 2010) followed by a rapid bootstrapping analysis. A  
538 posteriori bootstopping was automatically rendered in RAxML under the extended majority-rule  
539 consensus tree criterion (autoMRE). The best ML tree was rendered and edited in RStudio using  
540 the 'ggtree' (Yu et al. 2018) and 'treeio' (L.-G. Wang et al. 2020) packages.

541 Taxonomic classification of TbraPV2 and TbraPV3 was based on pairwise sequence identity. The  
542 L1 sequence of each pair was aligned at the amino acid level using the L-INS-I algorithm as  
543 implemented within the MAFFT v7.3 (Kato 2002; 2005). This way the alignments preserve the  
544 codons. The resulting alignments are back translated to nucleotide alignments and used to  
545 calculate pairwise sequence identity.

## 546 **E5. Coevolution analysis**

547 We used functions in the R 'ape' (Paradis and Schliep 2019) package to extract a well-supported  
548 clade from the maximum likelihood phylogenetic tree. The extracted clade represents contains  
549 viral sequences in the genera *Lambdapapillomavirus*, *Mupapillomavirus*, *Nupapillomavirus*,  
550 *Kappapapillomavirus*, *Sigmatapillomavirus*, and *Dyosigmatapillomavirus*, and the largest set of  
551 known of bat papillomaviruses, including the two novel bat papillomaviruses described in this  
552 paper. A corresponding host species phylogeny was downloaded from TimeTree  
553 ([www.timetree.org](http://www.timetree.org)) (Hedges, Dudley, and Kumar 2006; Kumar et al. 2017; Hedges et al. 2015).

554 A tanglegram representing the evolutionary relationship between the papillomaviruses and their  
555 hosts was constructed in the 'phytools' package (Revell 2012). Phytools will optimize the  
556 tanglegram by rotating nodes in the rooted phylogenies to minimize crossings between  
557 connecting lines between both trees.

558 An additional subtree was extracted to minimize the impact of the genus *Lamdapapillomavirus*.  
559 The viral types included in this smaller dataset are underlined in **Figure 2**. To assess the  
560 congruency between PV and host phylogenies, we used the Procrustes Approach to  
561 Cophylogenetic Analysis (PACo) (Balbuena, Míguez-Lozano, and Blasco-Costa 2013) as  
562 implemented in R for both datasets. Briefly, PACo uses cophenetic distance matrices for the virus  
563 and host trees and an association matrix of virus -host interactions. To assess statistical  
564 significance, a Procrustean super-imposition of the sum of squared residuals was generated from  
565 1000 network randomizations under the "r2" randomization model. Under this model, host  
566 specialization is assumed to drive the virus diversification (Hutchinson et al. 2017). The values

567 for the actual tree comparisons were considered statistically significant if they fell outside the 95%  
568 confidence interval (C.I.)

569 To quantify the similarity between the virus and host phylogenies, we calculated the Wasserstein  
570 distance using the 'castor' R package (Louca and Doebeli 2018). The Wasserstein distance is  
571 based on a modified graph Laplacian (MGL). The MGL uses evolutionary distances between  
572 nodes to construct a matrix which maintains branch length and tree topology information and  
573 allows for the comparison of phylogenies from different species. Specifically, the differences  
574 between a phylogeny's degree matrix (sum of branch lengths from one node  $n$  to all others) and  
575 distance matrix (sum of all pairwise branch lengths) is calculated to generate a spectrum of  
576 eigenvalues. To calculate a normalized MGL (nMGL) the MGL is divided by the degree matrix.  
577 The normalized MGL is specifically useful when comparing trees on different timescales by  
578 emphasizing topology over size (Lewitus and Morlon 2016). The Wasserstein distance represents  
579 the largest eigenvalue from the spectra of the modified graph Laplacians. All eigenvalues from  
580 the graph Laplacian spectrum were used to calculate the Wasserstein tree distance. The  
581 Wasserstein tree distance metric calculated in 'castor' considers branch length and tree topology,  
582 takes values between 0 and 1. Identical tree topologies would have a Wasserstein distance of 0.

### 583 **E6. Analysis of codon usage**

584 A custom script was used to delete all overlaps between open reading frames. Briefly, overlaps  
585 between E6 and E7, E1 and E8, E2 and E4, L2 and L1 were removed when present. For each  
586 overlap, entire codons were removed as not introduce frameshifts. These sequences were  
587 concatenated and further analyzed.

588 Cusp (Emboss suite of tools) was used to generate codon usage tables for each virus. These  
589 tables were compared using codcmp (Emboss suite of tools). For each codon in the table codcmp  
590 calculates the proportion of a codon to the total number of the codons in the. Next, codcmp  
591 calculates the difference between the usage fractions in both tables.

592 The amino acid composition for each sequence was calculated as described (Carugo 2008).

## 593 **E7. Diversifying selection of analysis of Yangochiroptera TLR9**

594 TLR9 sequences were downloaded from NCBI and translated into putative proteins. The amino  
595 acid sequences were aligned using MAFFT v7.3, and back translated into codon-aware  
596 nucleotide alignments. FastTree (Price, Dehal, and Arkin 2010) was used to construct a maximum  
597 likelihood phylogenetic tree using the GTR substitution model of evolution.

598 To determine whether the strength of natural selection intensified along the along  
599 Yangochiroptera compared to the Yinpterochiroptera, we used RELAX. After fitting a codon model  
600 with three  $\omega$  classes to the phylogeny (null model), RELAX then tests for changes to the intensity  
601 of selection by introducing a selection parameter  $k$ . The null and alternative models are compared  
602 using a Likelihood Ratio Test. A significant result of  $k > 1$  indicates that selection strength has been  
603 intensified along the test branches (Wertheim et al. 2015).

604 aBSREL (adaptive Branch-Site Random Effects Likelihood) was used to test if positive selection  
605 has occurred on the branches leading to Yangochiroptera. aBSREL determines whether a  
606 proportion of sites have evolved under positive selection (Smith et al. 2015).

607 Finally, FEL (Fixed Effects Likelihood) was used to infer non-synonymous (dN) and synonymous  
608 (dS) substitution rates on a per-site basis. This method assumes that the selection pressure for  
609 each site is constant along the entire phylogeny. FEL fits a MG94xREV model to each codon site  
610 to infer nonsynonymous and synonymous substitution rates at each site. A Likelihood Ratio Test  
611 determines if dN is significantly greater than dS.

## 612 **E8. Statistical analysis**

613 One- or two-way analysis of variance (ANOVA) were used where appropriate. Data are presented  
614 as box-and-whisker plots with Tukey's method for outliers noted as distinct data points. All graphs  
615 were generated using R. Results were considered statistically significant at a  $P$ -value of  $< 0.05$ .

616

## 617 **References**



- 618 Akira, Shizuo, Satoshi Uematsu, and Osamu Takeuchi. 2006. "Pathogen Recognition and Innate  
619 Immunity." *Cell* 124 (4): 783–801. <https://doi.org/10.1016/j.cell.2006.02.015>.
- 620 Aksoy, Pinar, Elinor Y. Gottschalk, and Patricio I. Meneses. 2017. "HPV Entry into Cells."  
621 *Mutation Research. Reviews in Mutation Research* 772 (June): 13–22.  
622 <https://doi.org/10.1016/j.mrrev.2016.09.004>.
- 623 Alexopoulou, Lena, Agnieszka Czopik Holt, Ruslan Medzhitov, and Richard A. Flavell. 2001.  
624 "Recognition of Double-Stranded RNA and Activation of NF- $\kappa$ B by Toll-like Receptor  
625 3." *Nature* 413 (6857): 732–38. <https://doi.org/10.1038/35099560>.
- 626 Altschul, S. F., W. Gish, W. Miller, E. W. Myers, and D. J. Lipman. 1990. "Basic Local  
627 Alignment Search Tool." *Journal of Molecular Biology* 215 (3): 403–10.  
628 [https://doi.org/10.1016/S0022-2836\(05\)80360-2](https://doi.org/10.1016/S0022-2836(05)80360-2).
- 629 Anderson, Sophia C., and Graeme D. Ruxton. 2020. "The Evolution of Flight in Bats: A Novel  
630 Hypothesis." *Mammal Review* 50 (4): 426–39. <https://doi.org/10.1111/mam.12211>.
- 631 Aydin, Inci, Ruth Villalonga-Planells, Lilo Greune, Matthew P. Bronnimann, Christine M.  
632 Calton, Miriam Becker, Kun-Yi Lai, Samuel K. Campos, M. Alexander Schmidt, and  
633 Mario Schelhaas. 2017. "A Central Region in the Minor Capsid Protein of  
634 Papillomaviruses Facilitates Viral Genome Tethering and Membrane Penetration for  
635 Mitotic Nuclear Entry." *PLoS Pathogens* 13 (5): e1006308.  
636 <https://doi.org/10.1371/journal.ppat.1006308>.
- 637 Aydin, Inci, Susanne Weber, Berend Snijder, Pilar Samperio Ventayol, Andreas Kühbacher,  
638 Miriam Becker, Patricia M. Day, et al. 2014. "Large Scale RNAi Reveals the  
639 Requirement of Nuclear Envelope Breakdown for Nuclear Import of Human  
640 Papillomaviruses." *PLoS Pathogens* 10 (5): e1004162.  
641 <https://doi.org/10.1371/journal.ppat.1004162>.
- 642 Balbuena, Juan Antonio, Raúl Míguez-Lozano, and Isabel Blasco-Costa. 2013. "PACo: A Novel  
643 Procrustes Application to Cophylogenetic Analysis." *PloS One* 8 (4): e61048.  
644 <https://doi.org/10.1371/journal.pone.0061048>.
- 645 Banerjee, Arinjay, Michelle L. Baker, Kirsten Kulcsar, Vikram Misra, Raina Plowright, and  
646 Karen Mossman. 2020. "Novel Insights Into Immune Systems of Bats." *Frontiers in*  
647 *Immunology* 11: 26. <https://doi.org/10.3389/fimmu.2020.00026>.
- 648 Bankevich, Anton, Sergey Nurk, Dmitry Antipov, Alexey A. Gurevich, Mikhail Dvorkin,  
649 Alexander S. Kulikov, Valery M. Lesin, et al. 2012. "SPAdes: A New Genome Assembly  
650 Algorithm and Its Applications to Single-Cell Sequencing." *Journal of Computational*  
651 *Biology* 19 (5): 455–77. <https://doi.org/10.1089/cmb.2012.0021>.
- 652 Barzilai, A. 2002. "ATM Deficiency and Oxidative Stress: A New Dimension of Defective  
653 Response to DNA Damage." *DNA Repair* 1 (1): 3–25. [https://doi.org/10.1016/S1568-7864\(01\)00007-6](https://doi.org/10.1016/S1568-7864(01)00007-6).
- 654  
655 Bell, J. K., J. Askins, P. R. Hall, D. R. Davies, and D. M. Segal. 2006. "The DsRNA Binding  
656 Site of Human Toll-like Receptor 3." *Proceedings of the National Academy of Sciences*  
657 103 (23): 8792–97. <https://doi.org/10.1073/pnas.0603245103>.
- 658 Bernard, Hans-Ulrich, Robert D. Burk, Zigui Chen, Koenraad van Doorslaer, Harald zur Hausen,  
659 and Ethel-Michele de Villiers. 2010. "Classification of Papillomaviruses (PVs) Based on  
660 189 PV Types and Proposal of Taxonomic Amendments." *Virology* 401 (1): 70–79.  
661 <https://doi.org/10.1016/j.virol.2010.02.002>.
- 662 Bieback, Karen, Egil Lien, Ingo M. Klagge, Elita Avota, Jürgen Schneider-Schaulies, W. Paul  
663 Duprex, Herrmann Wagner, Carsten J. Kirschning, Volker ter Meulen, and Sibylle

- 664 Schneider-Schaulies. 2002. “Hemagglutinin Protein of Wild-Type Measles Virus  
665 Activates Toll-Like Receptor 2 Signaling.” *Journal of Virology* 76 (17): 8729–36.  
666 <https://doi.org/10.1128/JVI.76.17.8729-8736.2002>.
- 667 Blanco, Jorge C. G., Marina S. Boukhvalova, Kari A. Shirey, Gregory A. Prince, and Stefanie N.  
668 Vogel. 2010. “New Insights for Development of a Safe and Protective RSV Vaccine.”  
669 *Human Vaccines* 6 (6): 482–92. <https://doi.org/10.4161/hv.6.6.11562>.
- 670 Boehme, Karl W., Mario Guerrero, and Teresa Compton. 2006. “Human Cytomegalovirus  
671 Envelope Glycoproteins B and H Are Necessary for TLR2 Activation in Permissive  
672 Cells.” *The Journal of Immunology* 177 (10): 7094–7102.  
673 <https://doi.org/10.4049/jimmunol.177.10.7094>.
- 674 Bolger, Anthony M., Marc Lohse, and Bjoern Usadel. 2014. “Trimmomatic: A Flexible Trimmer  
675 for Illumina Sequence Data.” *Bioinformatics* 30 (15): 2114–20.  
676 <https://doi.org/10.1093/bioinformatics/btu170>.
- 677 Bouvard, V., A. Storey, D. Pim, and L. Banks. 1994. “Characterization of the Human  
678 Papillomavirus E2 Protein: Evidence of Trans-Activation and Trans-Repression in  
679 Cervical Keratinocytes.” *The EMBO Journal* 13 (22): 5451–59.
- 680 Bowie, Andrew G., and Leonie Unterholzner. 2008. “Viral Evasion and Subversion of Pattern-  
681 Recognition Receptor Signalling.” *Nature Reviews. Immunology* 8 (12): 911–22.  
682 <https://doi.org/10.1038/nri2436>.
- 683 Brook, Cara E., and Andrew P. Dobson. 2015. “Bats as ‘Special’ Reservoirs for Emerging  
684 Zoonotic Pathogens.” *Trends in Microbiology* 23 (3): 172–80.  
685 <https://doi.org/10.1016/j.tim.2014.12.004>.
- 686 Buck, Christopher B., Patricia M. Day, and Benes L. Trus. 2013. “The Papillomavirus Major  
687 Capsid Protein L1.” *Virology* 445 (1–2): 169–74.  
688 <https://doi.org/10.1016/j.virol.2013.05.038>.
- 689 Buck, Christopher B., Koenraad Van Doorslaer, Alberto Peretti, Eileen M. Geoghegan, Michael  
690 J. Tisza, Ping An, Joshua P. Katz, et al. 2016. “The Ancient Evolutionary History of  
691 Polyomaviruses.” *PLoS Pathogens* 12 (4): e1005574.  
692 <https://doi.org/10.1371/journal.ppat.1005574>.
- 693 Burley, Megan, Sally Roberts, and Joanna L. Parish. 2020. “Epigenetic Regulation of Human  
694 Papillomavirus Transcription in the Productive Virus Life Cycle.” *Seminars in  
695 Immunopathology* 42 (2): 159–71. <https://doi.org/10.1007/s00281-019-00773-0>.
- 696 Bushnell, Brian. 2014. “BBMap: A Fast, Accurate, Splice-Aware Aligner.”  
697 <https://www.osti.gov/biblio/1241166>.
- 698 Calton, Christine M., Matthew P. Bronnimann, Ariana R. Manson, Shuai zhi Li, Janice A.  
699 Chapman, Marcela Suarez-Berumen, Tatum R. Williamson, Sudheer K. Molugu, Ricardo  
700 A. Bernal, and Samuel K. Campos. 2017. “Translocation of the Papillomavirus  
701 L2/VDNA Complex across the Limiting Membrane Requires the Onset of Mitosis.”  
702 *PLoS Pathogens* 13 (5): e1006200. <https://doi.org/10.1371/journal.ppat.1006200>.
- 703 Campos, Samuel K. 2017. “Subcellular Trafficking of the Papillomavirus Genome during Initial  
704 Infection: The Remarkable Abilities of Minor Capsid Protein L2.” *Viruses* 9 (12).  
705 <https://doi.org/10.3390/v9120370>.
- 706 Carey, Clayton M., Apurva A. Govande, Juliane M. Cooper, Melissa K. Hartley, Philip J.  
707 Kranzusch, and Nels C. Elde. 2019. “Recurrent Loss-of-Function Mutations Reveal Costs  
708 to OAS1 Antiviral Activity in Primates.” *Cell Host & Microbe* 25 (2): 336–343.e4.  
709 <https://doi.org/10.1016/j.chom.2019.01.001>.

- 710 Carugo, Oliviero. 2008. "Amino Acid Composition and Protein Dimension." *Protein Science: A*  
711 *Publication of the Protein Society* 17 (12): 2187–91.  
712 <https://doi.org/10.1110/ps.037762.108>.
- 713 Cerqueira, Carla, Pilar Samperio Ventayol, Christian Vogeley, and Mario Schelhaas. 2015.  
714 "Kallikrein-8 Proteolytically Processes Human Papillomaviruses in the Extracellular  
715 Space To Facilitate Entry into Host Cells." *Journal of Virology* 89 (14): 7038–52.  
716 <https://doi.org/10.1128/JVI.00234-15>.
- 717 Cheng, Xiaofei, Nasar Virk, Wei Chen, Shuqin Ji, Shuxian Ji, Yuqiang Sun, and Xiaoyun Wu.  
718 2013. "CpG Usage in RNA Viruses: Data and Hypotheses." Edited by Robert D. Burk.  
719 *PLoS ONE* 8 (9): e74109. <https://doi.org/10.1371/journal.pone.0074109>.
- 720 Choe, J. 2005. "Crystal Structure of Human Toll-Like Receptor 3 (TLR3) Ectodomain." *Science*  
721 309 (5734): 581–85. <https://doi.org/10.1126/science.1115253>.
- 722 Clote, P. 2005. "Structural RNA Has Lower Folding Energy than Random RNA of the Same  
723 Dinucleotide Frequency." *RNA* 11 (5): 578–91. <https://doi.org/10.1261/rna.7220505>.
- 724 Day, Patricia M., Carl C. Baker, Douglas R. Lowy, and John T. Schiller. 2004. "Establishment of  
725 Papillomavirus Infection Is Enhanced by Promyelocytic Leukemia Protein (PML)  
726 Expression." *Proceedings of the National Academy of Sciences of the United States of*  
727 *America* 101 (39): 14252–57. <https://doi.org/10.1073/pnas.0404229101>.
- 728 Day, Patricia M., and Mario Schelhaas. 2014. "Concepts of Papillomavirus Entry into Host  
729 Cells." *Current Opinion in Virology* 4 (February): 24–31.  
730 <https://doi.org/10.1016/j.coviro.2013.11.002>.
- 731 Day, Patricia M., Cynthia D. Thompson, Rachel M. Schowalter, Douglas R. Lowy, and John T.  
732 Schiller. 2013. "Identification of a Role for the Trans-Golgi Network in Human  
733 Papillomavirus 16 Pseudovirus Infection." *Journal of Virology* 87 (7): 3862–70.  
734 <https://doi.org/10.1128/JVI.03222-12>.
- 735 Diebold, S. S. 2004. "Innate Antiviral Responses by Means of TLR7-Mediated Recognition of  
736 Single-Stranded RNA." *Science* 303 (5663): 1529–31.  
737 <https://doi.org/10.1126/science.1093616>.
- 738 DiGiuseppe, Stephen, Malgorzata Bienkowska-Haba, Lucile G. M. Guion, Timothy R. Keiffer,  
739 and Martin Sapp. 2017. "Human Papillomavirus Major Capsid Protein L1 Remains  
740 Associated with the Incoming Viral Genome throughout the Entry Process." *Journal of*  
741 *Virology* 91 (16). <https://doi.org/10.1128/JVI.00537-17>.
- 742 DiGiuseppe, Stephen, Malgorzata Bienkowska-Haba, Lucile G. Guion, and Martin Sapp. 2017.  
743 "Cruising the Cellular Highways: How Human Papillomavirus Travels from the Surface  
744 to the Nucleus." *Virus Research* 231 (March): 1–9.  
745 <https://doi.org/10.1016/j.virusres.2016.10.015>.
- 746 Escalera-Zamudio, Marina, M. Lisandra Zepeda-Mendoza, Elizabeth Loza-Rubio, Edith Rojas-  
747 Anaya, Maria L. Méndez-Ojeda, Carlos F. Arias, and Alex D. Greenwood. 2015. "The  
748 Evolution of Bat Nucleic Acid-Sensing Toll-like Receptors." *Molecular Ecology* 24 (23):  
749 5899–5909. <https://doi.org/10.1111/mec.13431>.
- 750 Fathallah, Iqbal, Peggy Parroche, Henri Gruffat, Claudia Zannetti, Hanna Johansson, Jiping Yue,  
751 Evelyn Manet, Massimo Tommasino, Bakary S. Sylla, and Uzma A. Hasan. 2010. "EBV  
752 Latent Membrane Protein 1 Is a Negative Regulator of TLR9." *Journal of Immunology*  
753 *(Baltimore, Md.: 1950)* 185 (11): 6439–47. <https://doi.org/10.4049/jimmunol.0903459>.
- 754 Fujii, Takuma, Janet L. Brandsma, Xueyan Peng, Srinivasan Srimatkandada, Lei Li, Allon  
755 Canaan, and Albert B. Deisseroth. 2001. "High and Low Levels of Cottontail Rabbit

- 756 Papillomavirus E2 Protein Generate Opposite Effects on Gene Expression.” *Journal of*  
757 *Biological Chemistry* 276 (2): 867–74. <https://doi.org/10.1074/jbc.M007120200>.
- 758 Fuks, F. 2003. “The DNA Methyltransferases Associate with HP1 and the SUV39H1 Histone  
759 Methyltransferase.” *Nucleic Acids Research* 31 (9): 2305–12.  
760 <https://doi.org/10.1093/nar/gkg332>.
- 761 Gao, G. 2002. “Inhibition of Retroviral RNA Production by ZAP, a CCCH-Type Zinc Finger  
762 Protein.” *Science* 297 (5587): 1703–6. <https://doi.org/10.1126/science.1074276>.
- 763 Gorbunova, Vera, Andrei Seluanov, and Brian K. Kennedy. 2020. “The World Goes Bats:  
764 Living Longer and Tolerating Viruses.” *Cell Metabolism* 32 (1): 31–43.  
765 <https://doi.org/10.1016/j.cmet.2020.06.013>.
- 766 Gottschling, Marc, Markus Göker, Alexandros Stamatakis, Olaf R. P. Bininda-Emonds, Ingo  
767 Nindl, and Ignacio G. Bravo. 2011. “Quantifying the Phylodynamic Forces Driving  
768 Papillomavirus Evolution.” *Molecular Biology and Evolution* 28 (7): 2101–13.  
769 <https://doi.org/10.1093/molbev/msr030>.
- 770 Gottschling, Marc, Alexandros Stamatakis, Ingo Nindl, Eggert Stockfleth, Angel Alonso, and  
771 Ignacio G. Bravo. 2007. “Multiple Evolutionary Mechanisms Drive Papillomavirus  
772 Diversification.” *Molecular Biology and Evolution* 24 (5): 1242–58.  
773 <https://doi.org/10.1093/molbev/msm039>.
- 774 Gowen, Brian B., Justin D. Hoopes, Min-Hui Wong, Kie-Hoon Jung, Kevin C. Isakson, Lena  
775 Alexopoulou, Richard A. Flavell, and Robert W. Sidwell. 2006. “TLR3 Deletion Limits  
776 Mortality and Disease Severity Due to Phlebovirus Infection.” *The Journal of*  
777 *Immunology* 177 (9): 6301–7. <https://doi.org/10.4049/jimmunol.177.9.6301>.
- 778 Greenbaum, Benjamin D., Arnold J. Levine, Gyan Bhanot, and Raul Rabadan. 2008. “Patterns of  
779 Evolution and Host Gene Mimicry in Influenza and Other RNA Viruses.” Edited by  
780 Edward C. Holmes. *PLoS Pathogens* 4 (6): e1000079.  
781 <https://doi.org/10.1371/journal.ppat.1000079>.
- 782 Gupta, Chhedi Lal, Salman Akhtar, Andrew Waye, Nihar R. Pandey, Neelam Pathak, and Preeti  
783 Bajpai. 2015. “Cross Talk between Leishmania Donovanii CpG DNA and Toll-like  
784 Receptor 9: An Immunoinformatics Approach.” *Biochemical and Biophysical Research*  
785 *Communications* 459 (3): 424–29. <https://doi.org/10.1016/j.bbrc.2015.02.121>.
- 786 Hartmann, Gunther, and Arthur M. Krieg. 2000. “Mechanism and Function of a Newly Identified  
787 CpG DNA Motif in Human Primary B Cells.” *The Journal of Immunology* 164 (2): 944–  
788 53. <https://doi.org/10.4049/jimmunol.164.2.944>.
- 789 Hasan, Uzma A., Elizabeth Bates, Fumihiko Takeshita, Alexandra Biliato, Rosita Accardi,  
790 Veronique Bouvard, Mariam Mansour, et al. 2007. “TLR9 Expression and Function Is  
791 Abolished by the Cervical Cancer-Associated Human Papillomavirus Type 16.” *The*  
792 *Journal of Immunology* 178 (5): 3186–97. <https://doi.org/10.4049/jimmunol.178.5.3186>.
- 793 Hasan, Uzma A., Claudia Zannetti, Peggy Parroche, Nadège Goutagny, Marine Malfroy,  
794 Guillaume Roblot, Christine Carreira, et al. 2013. “The Human Papillomavirus Type 16  
795 E7 Oncoprotein Induces a Transcriptional Repressor Complex on the Toll-like Receptor  
796 9 Promoter.” *Journal of Experimental Medicine* 210 (7): 1369–87.  
797 <https://doi.org/10.1084/jem.20122394>.
- 798 Hawkins, John A., Maria E. Kaczmarek, Marcel A. Müller, Christian Drosten, William H. Press,  
799 and Sara L. Sawyer. 2019. “A Metaanalysis of Bat Phylogenetics and Positive Selection  
800 Based on Genomes and Transcriptomes from 18 Species.” *Proceedings of the National*  
801 *Academy of Sciences* 116 (23): 11351–60. <https://doi.org/10.1073/pnas.1814995116>.

- 802 Hedges, S. Blair, Joel Dudley, and Sudhir Kumar. 2006. “TimeTree: A Public Knowledge-Base  
803 of Divergence Times among Organisms.” *Bioinformatics (Oxford, England)* 22 (23):  
804 2971–72. <https://doi.org/10.1093/bioinformatics/btl505>.
- 805 Hedges, S. Blair, Julie Marin, Michael Suleski, Madeline Paymer, and Sudhir Kumar. 2015.  
806 “Tree of Life Reveals Clock-like Speciation and Diversification.” *Molecular Biology and*  
807 *Evolution* 32 (4): 835–45. <https://doi.org/10.1093/molbev/msv037>.
- 808 Heil, F. 2004. “Species-Specific Recognition of Single-Stranded RNA via Toll-like Receptor 7  
809 and 8.” *Science* 303 (5663): 1526–29. <https://doi.org/10.1126/science.1093620>.
- 810 Hemmi, Hiroaki, Tsuneyasu Kaisho, Osamu Takeuchi, Shintaro Sato, Hideki Sanjo, Katsuaki  
811 Hoshino, Takao Horiuchi, Hideyuki Tomizawa, Kiyoshi Takeda, and Shizuo Akira. 2002.  
812 “Small Anti-Viral Compounds Activate Immune Cells via the TLR7 MyD88-Dependent  
813 Signaling Pathway.” *Nature Immunology* 3 (2): 196–200. <https://doi.org/10.1038/ni758>.
- 814 Horton, John R, Anup K Upadhyay, Hank H Qi, Xing Zhang, Yang Shi, and Xiaodong Cheng.  
815 2010. “Enzymatic and Structural Insights for Substrate Specificity of a Family of Jumonji  
816 Histone Lysine Demethylases.” *Nature Structural & Molecular Biology* 17 (1): 38–43.  
817 <https://doi.org/10.1038/nsmb.1753>.
- 818 Hutchinson, Matthew C., E. Fernando Cagua, Juan A. Balbuena, Daniel B. Stouffer, and  
819 Timothée Poisot. 2017. “Paco: Implementing Procrustean Approach to Cophylogeny in  
820 R.” Edited by Richard Fitzjohn. *Methods in Ecology and Evolution* 8 (8): 932–40.  
821 <https://doi.org/10.1111/2041-210X.12736>.
- 822 Illingworth, Robert S., and Adrian P. Bird. 2009. “CpG Islands - ‘A Rough Guide.’” *FEBS*  
823 *Letters* 583 (11): 1713–20. <https://doi.org/10.1016/j.febslet.2009.04.012>.
- 824 Jiang, Haiying, Juan Li, Linmiao Li, Xiujuan Zhang, Lihong Yuan, and Jinping Chen. 2017.  
825 “Selective Evolution of Toll-like Receptors 3, 7, 8, and 9 in Bats.” *Immunogenetics* 69  
826 (4): 271–85. <https://doi.org/10.1007/s00251-016-0966-2>.
- 827 Johannsen, Eric, and Paul F. Lambert. 2013. “Epigenetics of Human Papillomaviruses.” *Virology*  
828 445 (1–2): 205–12. <https://doi.org/10.1016/j.virol.2013.07.016>.
- 829 Jude, Brooke A, Yelena Pobeziinskaya, Jennifer Bishop, Susannah Parke, Ruslan M Medzhitov,  
830 Alexander V Chervonsky, and Tatyana V Golovkina. 2003. “Subversion of the Innate  
831 Immune System by a Retrovirus.” *Nature Immunology* 4 (6): 573–78.  
832 <https://doi.org/10.1038/ni926>.
- 833 Jurk, Marion, Florian Heil, Jörg Vollmer, Christian Schetter, Arthur M. Krieg, Hermann Wagner,  
834 Grayson Lipford, and Stefan Bauer. 2002. “Human TLR7 or TLR8 Independently Confer  
835 Responsiveness to the Antiviral Compound R-848.” *Nature Immunology* 3 (6): 499.  
836 <https://doi.org/10.1038/ni0602-499>.
- 837 Katoh, K. 2002. “MAFFT: A Novel Method for Rapid Multiple Sequence Alignment Based on  
838 Fast Fourier Transform.” *Nucleic Acids Research* 30 (14): 3059–66.  
839 <https://doi.org/10.1093/nar/gkf436>.
- 840 ———. 2005. “MAFFT Version 5: Improvement in Accuracy of Multiple Sequence  
841 Alignment.” *Nucleic Acids Research* 33 (2): 511–18. <https://doi.org/10.1093/nar/gki198>.
- 842 Kawai, Taro, and Shizuo Akira. 2006. “Innate Immune Recognition of Viral Infection.” *Nature*  
843 *Immunology* 7 (2): 131–37. <https://doi.org/10.1038/ni1303>.
- 844 Kim, Kitai, Peggy A. Garner-Hamrick, Chris Fisher, Denis Lee, and Paul F. Lambert. 2003.  
845 “Methylation Patterns of Papillomavirus DNA, Its Influence on E2 Function, and  
846 Implications in Viral Infection.” *Journal of Virology* 77 (23): 12450–59.  
847 <https://doi.org/10.1128/jvi.77.23.12450-12459.2003>.

- 848 King, Kelly M., and Koenraad Van Doorslaer. 2018. "Building (Viral) Phylogenetic Trees Using  
849 a Maximum Likelihood Approach." *Current Protocols in Microbiology* 51 (1): e63.  
850 <https://doi.org/10.1002/cpmc.63>.
- 851 Kosakovsky Pong, Sergei L., and Simon D. W. Frost. 2005. "Not So Different After All: A  
852 Comparison of Methods for Detecting Amino Acid Sites Under Selection." *Molecular  
853 Biology and Evolution* 22 (5): 1208–22. <https://doi.org/10.1093/molbev/msi105>.
- 854 Krieg, Arthur M., Ae-Kyung Yi, Sara Matson, Thomas J. Waldschmidt, Gail A. Bishop, Rebecca  
855 Teasdale, Gary A. Koretzky, and Dennis M. Klinman. 1995. "CpG Motifs in Bacterial  
856 DNA Trigger Direct B-Cell Activation." *Nature* 374 (6522): 546–49.  
857 <https://doi.org/10.1038/374546a0>.
- 858 Kumar, Sudhir, Glen Stecher, Michael Suleski, and S. Blair Hedges. 2017. "TimeTree: A  
859 Resource for Timelines, Timetrees, and Divergence Times." *Molecular Biology and  
860 Evolution* 34 (7): 1812–19. <https://doi.org/10.1093/molbev/msx116>.
- 861 Lanfear, Robert, Paul B. Frandsen, April M. Wright, Tereza Senfeld, and Brett Calcott. 2017.  
862 "PartitionFinder 2: New Methods for Selecting Partitioned Models of Evolution for  
863 Molecular and Morphological Phylogenetic Analyses." *Molecular Biology and Evolution*  
864 34 (3): 772–73. <https://doi.org/10.1093/molbev/msw260>.
- 865 Lehnertz, Bernhard, Yoshihide Ueda, Alwin A.H.A. Derijck, Ulrich Braunschweig, Laura Perez-  
866 Burgos, Stefan Kubicek, Taiping Chen, En Li, Thomas Jenuwein, and Antoine H.F.M.  
867 Peters. 2003. "Suv39h-Mediated Histone H3 Lysine 9 Methylation Directs DNA  
868 Methylation to Major Satellite Repeats at Pericentric Heterochromatin." *Current Biology*  
869 13 (14): 1192–1200. [https://doi.org/10.1016/S0960-9822\(03\)00432-9](https://doi.org/10.1016/S0960-9822(03)00432-9).
- 870 Lei, Ming, and Dong Dong. 2016. "Phylogenomic Analyses of Bat Subordinal Relationships  
871 Based on Transcriptome Data." *Scientific Reports* 6 (1): 27726.  
872 <https://doi.org/10.1038/srep27726>.
- 873 Lewitus, Eric, and Helene Morlon. 2016. "Characterizing and Comparing Phylogenies from  
874 Their Laplacian Spectrum." *Systematic Biology* 65 (3): 495–507.  
875 <https://doi.org/10.1093/sysbio/syv116>.
- 876 Lin, Yao-Tang, Stephen Chiweshe, Dominique McCormick, Anna Raper, Arthur Wickenhagen,  
877 Victor DeFillipis, Eleanor Gaunt, Peter Simmonds, Sam J. Wilson, and Finn Grey. 2020.  
878 "Human Cytomegalovirus Evades ZAP Detection by Suppressing CpG Dinucleotides in  
879 the Major Immediate Early 1 Gene." Edited by Eain A. Murphy. *PLOS Pathogens* 16 (9):  
880 e1008844. <https://doi.org/10.1371/journal.ppat.1008844>.
- 881 Lipovsky, Alex, Andreea Popa, Genaro Pimienta, Michael Wyler, Ashima Bhan, Leena  
882 Kuruvilla, Marie-Aude Guie, et al. 2013. "Genome-Wide SiRNA Screen Identifies the  
883 Retromer as a Cellular Entry Factor for Human Papillomavirus." *Proceedings of the  
884 National Academy of Sciences of the United States of America* 110 (18): 7452–57.  
885 <https://doi.org/10.1073/pnas.1302164110>.
- 886 Louca, Stilianos, and Michael Doebeli. 2018. "Efficient Comparative Phylogenetics on Large  
887 Trees." *Bioinformatics (Oxford, England)* 34 (6): 1053–55.  
888 <https://doi.org/10.1093/bioinformatics/btx701>.
- 889 Lunyak, V. V. 2002. "Corepressor-Dependent Silencing of Chromosomal Regions Encoding  
890 Neuronal Genes." *Science* 298 (5599): 1747–52.  
891 <https://doi.org/10.1126/science.1076469>.

- 892 Luo, Xiu, Xinlu Wang, Yina Gao, Jingpeng Zhu, Songqing Liu, Guangxia Gao, and Pu Gao.  
893 2020. “Molecular Mechanism of RNA Recognition by Zinc-Finger Antiviral Protein.”  
894 *Cell Reports* 30 (1): 46-52.e4. <https://doi.org/10.1016/j.celrep.2019.11.116>.
- 895 McBride, Alison A. 2013. “The Papillomavirus E2 Proteins.” *Virology* 445 (1–2): 57–79.  
896 <https://doi.org/10.1016/j.virol.2013.06.006>.
- 897 Medzhitov, Ruslan. 2007. “Recognition of Microorganisms and Activation of the Immune  
898 Response.” *Nature* 449 (7164): 819–26. <https://doi.org/10.1038/nature06246>.
- 899 Miller, Mark A., Wayne Pfeiffer, and Terri Schwartz. 2010. “Creating the CIPRES Science  
900 Gateway for Inference of Large Phylogenetic Trees.” In *2010 Gateway Computing  
901 Environments Workshop (GCE)*, 1–8. New Orleans, LA, USA: IEEE.  
902 <https://doi.org/10.1109/GCE.2010.5676129>.
- 903 Miyata, T., and T. Yasunaga. 1978. “Evolution of Overlapping Genes.” *Nature* 272 (5653): 532–  
904 35. <https://doi.org/10.1038/272532a0>.
- 905 Murawski, Matthew R., Glennice N. Bowen, Anna M. Cerny, Larry J. Anderson, Lia M. Haynes,  
906 Ralph A. Tripp, Evelyn A. Kurt-Jones, and Robert W. Finberg. 2009. “Respiratory  
907 Syncytial Virus Activates Innate Immunity through Toll-Like Receptor 2.” *Journal of  
908 Virology* 83 (3): 1492–1500. <https://doi.org/10.1128/JVI.00671-08>.
- 909 Nan, X., H. H. Ng, C. A. Johnson, C. D. Laherty, B. M. Turner, R. N. Eisenman, and A. Bird.  
910 1998. “Transcriptional Repression by the Methyl-CpG-Binding Protein MeCP2 Involves  
911 a Histone Deacetylase Complex.” *Nature* 393 (6683): 386–89.  
912 <https://doi.org/10.1038/30764>.
- 913 Ohto, Umeharu, Takuma Shibata, Hiromi Tanji, Hanako Ishida, Elena Krayukhina, Susumu  
914 Uchiyama, Kensuke Miyake, and Toshiyuki Shimizu. 2015. “Structural Basis of CpG and  
915 Inhibitory DNA Recognition by Toll-like Receptor 9.” *Nature* 520 (7549): 702–5.  
916 <https://doi.org/10.1038/nature14138>.
- 917 O’Shea, Thomas J., Paul M. Cryan, Andrew A. Cunningham, Anthony R. Fooks, David T.S.  
918 Hayman, Angela D. Luis, Alison J. Peel, Raina K. Plowright, and James L.N. Wood.  
919 2014. “Bat Flight and Zoonotic Viruses.” *Emerging Infectious Diseases* 20 (5): 741–45.  
920 <https://doi.org/10.3201/eid2005.130539>.
- 921 Oshiumi, Hiroyuki, Masaaki Okamoto, Ken Fujii, Takashi Kawanishi, Misako Matsumoto,  
922 Satoshi Koike, and Tsukasa Seya. 2011. “The TLR3/TICAM-1 Pathway Is Mandatory for  
923 Innate Immune Responses to Poliovirus Infection.” *The Journal of Immunology* 187 (10):  
924 5320–27. <https://doi.org/10.4049/jimmunol.1101503>.
- 925 Otani, Junji, Toshiyuki Nankumo, Kyohei Arita, Susumu Inamoto, Mariko Ariyoshi, and  
926 Masahiro Shirakawa. 2009. “Structural Basis for Recognition of H3K4 Methylation  
927 Status by the DNA Methyltransferase 3A ATRX-DNMT3-DNMT3L Domain.” *EMBO  
928 Reports* 10 (11): 1235–41. <https://doi.org/10.1038/embor.2009.218>.
- 929 Pacini, Laura, Maria Grazia Ceraolo, Assunta Venuti, Giusi Melita, Uzma A. Hasan, Rosita  
930 Accardi, and Massimo Tommasino. 2017. “UV Radiation Activates Toll-Like Receptor 9  
931 Expression in Primary Human Keratinocytes, an Event Inhibited by Human  
932 Papillomavirus 38 E6 and E7 Oncoproteins.” *Journal of Virology* 91 (19).  
933 <https://doi.org/10.1128/JVI.01123-17>.
- 934 Pacini, Laura, Claudia Savini, Raffaella Ghittoni, Djamel Saidj, Jerome Lamartine, Uzma A.  
935 Hasan, Rosita Accardi, and Massimo Tommasino. 2015. “Downregulation of Toll-Like  
936 Receptor 9 Expression by Beta Human Papillomavirus 38 and Implications for Cell Cycle

- 937 Control.” Edited by R. M. Sandri-Goldin. *Journal of Virology* 89 (22): 11396–405.  
938 <https://doi.org/10.1128/JVI.02151-15>.
- 939 Paradis, Emmanuel, and Klaus Schliep. 2019. “Ape 5.0: An Environment for Modern  
940 Phylogenetics and Evolutionary Analyses in R.” *Bioinformatics (Oxford, England)* 35  
941 (3): 526–28. <https://doi.org/10.1093/bioinformatics/bty633>.
- 942 Payne, Natalie, Simona Kraberger, Rafaela S. Fontenele, Kara Schmidlin, Melissa H. Bergeman,  
943 Ivonne Cassaigne, Melanie Culver, Arvind Varsani, and Koenraad Van Doorslaer. 2020.  
944 “Novel Circoviruses Detected in Feces of Sonoran Felids.” *Viruses* 12 (9).  
945 <https://doi.org/10.3390/v12091027>.
- 946 Peng, Chen, Linda S. Wyatt, Shira G. Glushakow-Smith, Madhu Lal-Nag, Andrea S. Weisberg,  
947 and Bernard Moss. 2020. “Zinc-Finger Antiviral Protein (ZAP) Is a Restriction Factor for  
948 Replication of Modified Vaccinia Virus Ankara (MVA) in Human Cells.” Edited by  
949 Matthew S. Wiebe. *PLOS Pathogens* 16 (8): e1008845.  
950 <https://doi.org/10.1371/journal.ppat.1008845>.
- 951 Pohar, Jelka, Duško Lainšček, Ryutarō Fukui, Chikako Yamamoto, Kensuke Miyake, Roman  
952 Jerala, and Mojca Benčina. 2015. “Species-Specific Minimal Sequence Motif for  
953 Oligodeoxyribonucleotides Activating Mouse TLR9.” *The Journal of Immunology* 195  
954 (9): 4396–4405. <https://doi.org/10.4049/jimmunol.1500600>.
- 955 Popa, Andreea, Wei Zhang, Megan S. Harrison, Kyliya Goodner, Teymur Kazakov, Edward C.  
956 Goodwin, Alex Lipovsky, Christopher G. Burd, and Daniel DiMaio. 2015. “Direct  
957 Binding of Retromer to Human Papillomavirus Type 16 Minor Capsid Protein L2  
958 Mediates Endosome Exit during Viral Infection.” *PLoS Pathogens* 11 (2): e1004699.  
959 <https://doi.org/10.1371/journal.ppat.1004699>.
- 960 Porter, Samuel S., Jennifer C. Liddle, Kristen Browne, Diana V. Pastrana, Benjamin A. Garcia,  
961 Christopher B. Buck, Matthew D. Weitzman, and Alison A. McBride. 2021. “Histone  
962 Modifications in Papillomavirus Virion Minichromosomes.” Edited by Thomas Shenk.  
963 *MBio* 12 (1): e03274-20, [/mbio/12/1/mBio.03274-20.atom](https://doi.org/10.1128/mBio.03274-20).  
964 <https://doi.org/10.1128/mBio.03274-20>.
- 965 Price, Morgan N., Paramvir S. Dehal, and Adam P. Arkin. 2010. “FastTree 2 – Approximately  
966 Maximum-Likelihood Trees for Large Alignments.” Edited by Art F. Y. Poon. *PLoS*  
967 *ONE* 5 (3): e9490. <https://doi.org/10.1371/journal.pone.0009490>.
- 968 Rassa, John C., Jennifer L. Meyers, Yuanming Zhang, Rama Kudaravalli, and Susan R. Ross.  
969 2002. “Murine Retroviruses Activate B Cells via Interaction with Toll-like Receptor 4.”  
970 *Proceedings of the National Academy of Sciences of the United States of America* 99 (4):  
971 2281–86. <https://doi.org/10.1073/pnas.042355399>.
- 972 Rector, Annabel, Philippe Lemey, Ruth Tachezy, Sara Mostmans, Shin-Je Ghim, Koenraad Van  
973 Doorslaer, Melody Roelke, et al. 2007. “Ancient Papillomavirus-Host Co-Speciation in  
974 Felidae.” *Genome Biology* 8 (4): R57. <https://doi.org/10.1186/gb-2007-8-4-r57>.
- 975 Revell, Liam J. 2012. “Phytools: An R Package for Phylogenetic Comparative Biology (and  
976 Other Things): *Phytools: R Package*.” *Methods in Ecology and Evolution* 3 (2): 217–23.  
977 <https://doi.org/10.1111/j.2041-210X.2011.00169.x>.
- 978 Richards, Rebecca M., Douglas R. Lowy, John T. Schiller, and Patricia M. Day. 2006. “Cleavage  
979 of the Papillomavirus Minor Capsid Protein, L2, at a Furin Consensus Site Is Necessary  
980 for Infection.” *Proceedings of the National Academy of Sciences of the United States of*  
981 *America* 103 (5): 1522–27. <https://doi.org/10.1073/pnas.0508815103>.



- 982 Rose, Nathan R., and Robert J. Klose. 2014. "Understanding the Relationship between DNA  
983 Methylation and Histone Lysine Methylation." *Biochimica et Biophysica Acta (BBA) -*  
984 *Gene Regulatory Mechanisms* 1839 (12): 1362–72.  
985 <https://doi.org/10.1016/j.bbagr.2014.02.007>.
- 986 Sawyer, Sara L., Michael Emerman, and Harmit S. Malik. 2004. "Ancient Adaptive Evolution of  
987 the Primate Antiviral DNA-Editing Enzyme APOBEC3G." *PLoS Biology* 2 (9): E275.  
988 <https://doi.org/10.1371/journal.pbio.0020275>.
- 989 Schelhaas, Mario, Bhavin Shah, Michael Holzer, Peter Blattmann, Lena Kühling, Patricia M.  
990 Day, John T. Schiller, and Ari Helenius. 2012. "Entry of Human Papillomavirus Type 16  
991 by Actin-Dependent, Clathrin- and Lipid Raft-Independent Endocytosis." *PLoS*  
992 *Pathogens* 8 (4): e1002657. <https://doi.org/10.1371/journal.ppat.1002657>.
- 993 Sen, George L., Jason A. Reuter, Daniel E. Webster, Lilly Zhu, and Paul A. Khavari. 2010.  
994 "DNMT1 Maintains Progenitor Function in Self-Renewing Somatic Tissue." *Nature* 463  
995 (7280): 563–67. <https://doi.org/10.1038/nature08683>.
- 996 Sen, Goutam, Michael Flora, Gouri Chattopadhyay, Dennis M. Klinman, Andrew Lees, James J.  
997 Mond, and Clifford M. Snapper. 2004. "The Critical DNA Flanking Sequences of a CpG  
998 Oligodeoxynucleotide, but Not the 6 Base CpG Motif, Can Be Replaced with RNA  
999 without Quantitative or Qualitative Changes in Toll-like Receptor 9-Mediated Activity."  
1000 *Cellular Immunology* 232 (1–2): 64–74. <https://doi.org/10.1016/j.cellimm.2005.01.010>.
- 1001 Shahzad, Naveed, Masahiro Shuda, Tarik Gheit, Hyun Jin Kwun, Iris Cornet, Djamel Saidj,  
1002 Claudia Zannetti, et al. 2013. "The T Antigen Locus of Merkel Cell Polyomavirus  
1003 Downregulates Human Toll-like Receptor 9 Expression." *Journal of Virology* 87 (23):  
1004 13009–19. <https://doi.org/10.1128/JVI.01786-13>.
- 1005 Sharp, Paul M., Therese M.F. Tuohy, and Krzysztof R. Mosurski. 1986. "Codon Usage in Yeast:  
1006 Cluster Analysis Clearly Differentiates Highly and Lowly Expressed Genes." *Nucleic*  
1007 *Acids Research* 14 (13): 5125–43. <https://doi.org/10.1093/nar/14.13.5125>.
- 1008 Shen, Y.-Y., L. Liang, Z.-H. Zhu, W.-P. Zhou, D. M. Irwin, and Y.-P. Zhang. 2010. "Adaptive  
1009 Evolution of Energy Metabolism Genes and the Origin of Flight in Bats." *Proceedings of*  
1010 *the National Academy of Sciences* 107 (19): 8666–71.  
1011 <https://doi.org/10.1073/pnas.0912613107>.
- 1012 Smeele, Zoe E., Jennifer M. Burns, Koenraad Van Doorsaler, Rafaela S. Fontenele, Kara Waits,  
1013 Daisy Stinton, Michelle R. Shero, et al. 2018. "Diverse Papillomaviruses Identified in  
1014 Weddell Seals." *The Journal of General Virology*, February.  
1015 <https://doi.org/10.1099/jgv.0.001028>.
- 1016 Smith, Martin D., Joel O. Wertheim, Steven Weaver, Ben Murrell, Konrad Scheffler, and Sergei  
1017 L. Kosakovsky Pond. 2015. "Less Is More: An Adaptive Branch-Site Random Effects  
1018 Model for Efficient Detection of Episodic Diversifying Selection." *Molecular Biology*  
1019 *and Evolution* 32 (5): 1342–53. <https://doi.org/10.1093/molbev/msv022>.
- 1020 Sorouri, Mahsa, Tyron Chang, Palmy Jesudhasan, Chelsea Pinkham, Nels C. Elde, and Dustin C.  
1021 Hancks. 2020. "Signatures of Host–Pathogen Evolutionary Conflict Reveal MISTR—A  
1022 Conserved Mitochondrial STress Response Network." Edited by Mark L Siegal. *PLOS*  
1023 *Biology* 18 (12): e3001045. <https://doi.org/10.1371/journal.pbio.3001045>.
- 1024 Springer, M. S., E. C. Teeling, O. Madsen, M. J. Stanhope, and W. W. de Jong. 2001.  
1025 "Integrated Fossil and Molecular Data Reconstruct Bat Echolocation." *Proceedings of the*  
1026 *National Academy of Sciences* 98 (11): 6241–46.  
1027 <https://doi.org/10.1073/pnas.111551998>.

- 1028 Stamatakis, Alexandros. 2014. “RAxML Version 8: A Tool for Phylogenetic Analysis and Post-  
1029 Analysis of Large Phylogenies.” *Bioinformatics* 30 (9): 1312–13.  
1030 <https://doi.org/10.1093/bioinformatics/btu033>.
- 1031 Steger, G, and S Corbach. 1997. “Dose-Dependent Regulation of the Early Promoter of Human  
1032 Papillomavirus Type 18 by the Viral E2 Protein.” *Journal of Virology* 71 (1): 50–58.  
1033 <https://doi.org/10.1128/JVI.71.1.50-58.1997>.
- 1034 Stephen F Altschul and Erickson Bruce W. 1985. “Significance of Nucleotide Sequence  
1035 Alignments: A Method for Random Sequence Permutation That Preserves Dinucleotide  
1036 and Codon Usage.” *Molecular Biology and Evolution*, November.  
1037 <https://doi.org/10.1093/oxfordjournals.molbev.a040370>.
- 1038 Stepp, Wesley H., James D. Stamos, Simran Khurana, Alix Warburton, and Alison A. McBride.  
1039 2017. “Sp100 Colocalizes with HPV Replication Foci and Restricts the Productive Stage  
1040 of the Infectious Cycle.” Edited by Paul Francis Lambert. *PLOS Pathogens* 13 (10):  
1041 e1006660. <https://doi.org/10.1371/journal.ppat.1006660>.
- 1042 Subudhi, Sonu, Noreen Rapin, and Vikram Misra. 2019. “Immune System Modulation and Viral  
1043 Persistence in Bats: Understanding Viral Spillover.” *Viruses* 11 (2).  
1044 <https://doi.org/10.3390/v11020192>.
- 1045 Takata, Matthew A., Daniel Gonçalves-Carneiro, Trinity M. Zang, Steven J. Soll, Ashley York,  
1046 Daniel Blanco-Melo, and Paul D. Bieniasz. 2017. “CG Dinucleotide Suppression Enables  
1047 Antiviral Defence Targeting Non-Self RNA.” *Nature* 550 (7674): 124–27.  
1048 <https://doi.org/10.1038/nature24039>.
- 1049 Tan, Bing, Xing-Lou Yang, Xing-Yi Ge, Cheng Peng, Hai-Zhou Liu, Yun-Zhi Zhang, Li-Biao  
1050 Zhang, and Zheng-Li Shi. 2017. “Novel Bat Adenoviruses with Low G+C Content Shed  
1051 New Light on the Evolution of Adenoviruses.” *The Journal of General Virology* 98 (4):  
1052 739–48. <https://doi.org/10.1099/jgv.0.000739>.
- 1053 Taubenberger, Jeffery K., and John C. Kash. 2010. “Influenza Virus Evolution, Host Adaptation,  
1054 and Pandemic Formation.” *Cell Host & Microbe* 7 (6): 440–51.  
1055 <https://doi.org/10.1016/j.chom.2010.05.009>.
- 1056 Teeling, E. C., O. Madsen, R. A. Van Den Bussche, W. W. de Jong, M. J. Stanhope, and M. S.  
1057 Springer. 2002. “Microbat Paraphyly and the Convergent Evolution of a Key Innovation  
1058 in Old World Rhinolophoid Microbats.” *Proceedings of the National Academy of  
1059 Sciences* 99 (3): 1431–36. <https://doi.org/10.1073/pnas.022477199>.
- 1060 Thain, A., K. Webster, D. Emery, A. R. Clarke, and K. Gaston. 1997. “DNA Binding and  
1061 Bending by the Human Papillomavirus Type 16 E2 Protein. Recognition of an Extended  
1062 Binding Site.” *The Journal of Biological Chemistry* 272 (13): 8236–42.  
1063 <https://doi.org/10.1074/jbc.272.13.8236>.
- 1064 Thierry, F., and M. Yaniv. 1987. “The BPV1-E2 Trans-Acting Protein Can Be Either an  
1065 Activator or a Repressor of the HPV18 Regulatory Region.” *The EMBO Journal* 6 (11):  
1066 3391–97.
- 1067 Thompson, J, and A Iwasaki. 2008. “Toll-like Receptors Regulation of Viral Infection and  
1068 Disease☆.” *Advanced Drug Delivery Reviews* 60 (7): 786–94.  
1069 <https://doi.org/10.1016/j.addr.2007.11.003>.
- 1070 Thompson, Mikayla R., John J. Kaminski, Evelyn A. Kurt-Jones, and Katherine A. Fitzgerald.  
1071 2011. “Pattern Recognition Receptors and the Innate Immune Response to Viral  
1072 Infection.” *Viruses* 3 (6): 920–40. <https://doi.org/10.3390/v3060920>.

- 1073 Tsagkogeorga, Georgia, Joe Parker, Elia Stupka, James A. Cotton, and Stephen J. Rossiter. 2013.  
1074 “Phylogenomic Analyses Elucidate the Evolutionary Relationships of Bats.” *Current*  
1075 *Biology* 23 (22): 2262–67. <https://doi.org/10.1016/j.cub.2013.09.014>.
- 1076 Uhlorn, Brittany L., Eduardo R. Gamez, Shuaizhi Li, and Samuel K. Campos. 2020.  
1077 “Attenuation of CGAS/STING Activity during Mitosis.” *Life Science Alliance* 3 (9).  
1078 <https://doi.org/10.26508/lsa.201900636>.
- 1079 Uhlorn, Brittany L., Robert Jackson, Shuaizhi Li, Shauna M. Bratton, Koenraad Van Doorslaer,  
1080 and Samuel K. Campos. 2020. “Vesicular Trafficking Permits Evasion of CGAS/STING  
1081 Surveillance during Initial Human Papillomavirus Infection.” Edited by Paul Francis  
1082 Lambert. *PLOS Pathogens* 16 (11): e1009028.  
1083 <https://doi.org/10.1371/journal.ppat.1009028>.
- 1084 Upadhyay, Mohita, and Perumal Vivekanandan. 2015. “Depletion of CpG Dinucleotides in  
1085 Papillomaviruses and Polyomaviruses: A Role for Divergent Evolutionary Pressures.”  
1086 Edited by Robert D. Burk. *PLOS ONE* 10 (11): e0142368.  
1087 <https://doi.org/10.1371/journal.pone.0142368>.
- 1088 Van Doorslaer, Koenraad. 2013. “Evolution of the Papillomaviridae.” *Virology* 445 (1–2): 11–  
1089 20. <https://doi.org/10.1016/j.virol.2013.05.012>.
- 1090 Van Doorslaer, Koenraad, Zigui Chen, Hans-Ulrich Bernard, Paul K. S. Chan, Rob DeSalle,  
1091 Joakim Dillner, Ola Forslund, et al. 2018. “ICTV Virus Taxonomy Profile:  
1092 Papillomaviridae.” *The Journal of General Virology* 99 (8): 989–90.  
1093 <https://doi.org/10.1099/jgv.0.001105>.
- 1094 Van Doorslaer, Koenraad, and Joakim Dillner. 2019. “The Launch of an International Animal  
1095 Papillomavirus Reference Center.” *Viruses* 11 (1). <https://doi.org/10.3390/v11010055>.
- 1096 Van Doorslaer, Koenraad, Zhiwen Li, Sandhya Xirasagar, Piet Maes, David Kaminsky, David  
1097 Liou, Qiang Sun, Ramandeep Kaur, Yentram Huyen, and Alison A. McBride. 2017. “The  
1098 Papillomavirus Episteme: A Major Update to the Papillomavirus Sequence Database.”  
1099 *Nucleic Acids Research* 45 (D1): D499–506. <https://doi.org/10.1093/nar/gkw879>.
- 1100 Van Doorslaer, Koenraad, and Alison A. McBride. 2016. “Molecular Archeological Evidence in  
1101 Support of the Repeated Loss of a Papillomavirus Gene.” *Scientific Reports* 6  
1102 (September): 33028. <https://doi.org/10.1038/srep33028>.
- 1103 Van Doorslaer, Koenraad, Qina Tan, Sandhya Xirasagar, Sandya Bandaru, Vivek Gopalan,  
1104 Yasmin Mohamoud, Yentram Huyen, and Alison A. McBride. 2013. “The  
1105 Papillomavirus Episteme: A Central Resource for Papillomavirus Sequence Data and  
1106 Analysis.” *Nucleic Acids Research* 41 (Database issue): D571–578.  
1107 <https://doi.org/10.1093/nar/gks984>.
- 1108 Villiers, Ethel-Michele de, Claude Fauquet, Thomas R. Broker, Hans-Ulrich Bernard, and Harald  
1109 zur Hausen. 2004. “Classification of Papillomaviruses.” *Virology* 324 (1): 17–27.  
1110 <https://doi.org/10.1016/j.virol.2004.03.033>.
- 1111 Vincent, Isabelle E., Claudia Zannetti, Julie Lucifora, Helene Norder, Ulrike Protzer, Pierre  
1112 Hainaut, Fabien Zoulim, et al. 2011. “Hepatitis B Virus Impairs TLR9 Expression and  
1113 Function in Plasmacytoid Dendritic Cells.” *PloS One* 6 (10): e26315.  
1114 <https://doi.org/10.1371/journal.pone.0026315>.
- 1115 Vinokurova, Svetlana, and Magnus von Knebel Doeberitz. 2011. “Differential Methylation of  
1116 the HPV 16 Upstream Regulatory Region during Epithelial Differentiation and  
1117 Neoplastic Transformation.” Edited by Torbjorn Ramqvist. *PLoS ONE* 6 (9): e24451.  
1118 <https://doi.org/10.1371/journal.pone.0024451>.

- 1119 Wacharapluesadee, Supaporn, Chee Wah Tan, Patarapol Maneeorn, Prateep Duengkae, Feng  
1120 Zhu, Yutthana Joyjinda, Thongchai Kaewpom, et al. 2021. “Evidence for SARS-CoV-2  
1121 Related Coronaviruses Circulating in Bats and Pangolins in Southeast Asia.” *Nature*  
1122 *Communications* 12 (1): 972. <https://doi.org/10.1038/s41467-021-21240-1>.
- 1123 Wang, Joshua W., and Richard B.S. Roden. 2013. “L2, the Minor Capsid Protein of  
1124 Papillomavirus.” *Virology* 445 (0): 175–86. <https://doi.org/10.1016/j.virol.2013.04.017>.
- 1125 Wang, Li-Gen, Tommy Tsan-Yuk Lam, Shuangbin Xu, Zehan Dai, Lang Zhou, Tingze Feng,  
1126 Pingfan Guo, et al. 2020. “Treeio: An R Package for Phylogenetic Tree Input and Output  
1127 with Richly Annotated and Associated Data.” *Molecular Biology and Evolution* 37 (2):  
1128 599–603. <https://doi.org/10.1093/molbev/msz240>.
- 1129 Warren, Cody J., Koenraad Van Doorslaer, Ahwan Pandey, Joaquin M. Espinosa, and Dohun  
1130 Pyeon. 2015. “Role of the Host Restriction Factor APOBEC3 on Papillomavirus  
1131 Evolution.” *Virus Evolution* 1 (1). <https://doi.org/10.1093/ve/vev015>.
- 1132 Warren, Cody J., Tao Xu, Kejun Guo, Laura M. Griffin, Joseph A. Westrich, Denis Lee, Paul F.  
1133 Lambert, Mario L. Santiago, and Dohun Pyeon. 2015. “APOBEC3A Functions as a  
1134 Restriction Factor of Human Papillomavirus.” *Journal of Virology* 89 (1): 688–702.  
1135 <https://doi.org/10.1128/JVI.02383-14>.
- 1136 Weber, Friedemann, Valentina Wagner, Simon B. Rasmussen, Rune Hartmann, and Søren R.  
1137 Paludan. 2006. “Double-Stranded RNA Is Produced by Positive-Strand RNA Viruses and  
1138 DNA Viruses but Not in Detectable Amounts by Negative-Strand RNA Viruses.” *Journal*  
1139 *of Virology* 80 (10): 5059–64. <https://doi.org/10.1128/JVI.80.10.5059-5064.2006>.
- 1140 Weber, Michael, Ines Hellmann, Michael B Stadler, Liliana Ramos, Svante Pääbo, Michael  
1141 Rebhan, and Dirk Schübeler. 2007. “Distribution, Silencing Potential and Evolutionary  
1142 Impact of Promoter DNA Methylation in the Human Genome.” *Nature Genetics* 39 (4):  
1143 457–66. <https://doi.org/10.1038/ng1990>.
- 1144 Wertheim, Joel O., Ben Murrell, Martin D. Smith, Sergei L. Kosakovsky Pond, and Konrad  
1145 Scheffler. 2015. “RELAX: Detecting Relaxed Selection in a Phylogenetic Framework.”  
1146 *Molecular Biology and Evolution* 32 (3): 820–32.  
1147 <https://doi.org/10.1093/molbev/msu400>.
- 1148 Willemsen, Anouk, and Ignacio G. Bravo. 2019. “Origin and Evolution of Papillomavirus  
1149 (Onco)Genes and Genomes.” *Philosophical Transactions of the Royal Society of London.*  
1150 *Series B, Biological Sciences* 374 (1773): 20180303.  
1151 <https://doi.org/10.1098/rstb.2018.0303>.
- 1152 Wong, Emily HM, David K Smith, Raul Rabadan, Malik Peiris, and Leo LM Poon. 2010.  
1153 “Codon Usage Bias and the Evolution of Influenza A Viruses. Codon Usage Biases of  
1154 Influenza Virus.” *BMC Evolutionary Biology* 10 (1): 253. [https://doi.org/10.1186/1471-](https://doi.org/10.1186/1471-2148-10-253)  
1155 [2148-10-253](https://doi.org/10.1186/1471-2148-10-253).
- 1156 Xie, Jiazheng, Yang Li, Xurui Shen, Geraldine Goh, Yan Zhu, Jie Cui, Lin-Fa Wang, Zheng-Li  
1157 Shi, and Peng Zhou. 2018. “Dampened STING-Dependent Interferon Activation in Bats.”  
1158 *Cell Host & Microbe* 23 (3): 297-301.e4. <https://doi.org/10.1016/j.chom.2018.01.006>.
- 1159 Yi, A. K., M. Chang, D. W. Peckham, A. M. Krieg, and R. F. Ashman. 1998. “CpG  
1160 Oligodeoxyribonucleotides Rescue Mature Spleen B Cells from Spontaneous Apoptosis  
1161 and Promote Cell Cycle Entry.” *Journal of Immunology (Baltimore, Md.: 1950)* 160 (12):  
1162 5898–5906.

- 1163 Yu, Guangchuang, Tommy Tsan-Yuk Lam, Huachen Zhu, and Yi Guan. 2018. “Two Methods  
1164 for Mapping and Visualizing Associated Data on Phylogeny Using Ggtree.” *Molecular*  
1165 *Biology and Evolution* 35 (12): 3041–43. <https://doi.org/10.1093/molbev/msy194>.
- 1166 Zhang, Guojie, Christopher Cowled, Zhengli Shi, Zhiyong Huang, Kimberly A. Bishop-Lilly,  
1167 Xiaodong Fang, James W. Wynne, et al. 2013. “Comparative Analysis of Bat Genomes  
1168 Provides Insight into the Evolution of Flight and Immunity.” *Science (New York, N.Y.)*  
1169 339 (6118): 456–60. <https://doi.org/10.1126/science.1230835>.
- 1170 Zucchini, Nicolas, Gilles Bessou, Stephanie Traub, Scott H. Robbins, Satoshi Uematsu, Shizuo  
1171 Akira, Lena Alexopoulou, and Marc Dalod. 2008. “Cutting Edge: Overlapping Functions  
1172 of TLR7 and TLR9 for Innate Defense against a Herpesvirus Infection.” *The Journal of*  
1173 *Immunology* 180 (9): 5799–5803. <https://doi.org/10.4049/jimmunol.180.9.5799>.  
1174
- 1175

1176 **Figure Legends**

1177 **Figure 1 Evolutionary relationship of novel bat papillomaviruses**

1178 (A) Maximum-likelihood phylogenetic tree inferred using concatenated E1, E2, and L1 protein  
1179 sequences. Papillomaviruses associated with *Chiroptera* are highlighted Yangochiroptera  
1180 (orange) and Yinpterochiroptera (red). Papillomavirus genera are collapsed (number of  
1181 types within each genus are indicated in parentheses). Bootstrap generated branch  
1182 support values are given using symbols and color gradient. Host species are indicated  
1183 using Sonoran Desert dwelling animals. The red arrow indicates the subtree used for  
1184 further analyses throughout the manuscript.

1185 (B) Pairwise identity plot with percentage pairwise identities provided in colored boxes for the  
1186 L1 nucleotide sequences.

1187

1188 **Figure 2 Co-evolution of papillomaviruses**

1189 (A) Optimized tanglegram between subtree based on concatenated E1–E2–L1 maximum-  
1190 likelihood phylogenetic tree (see **Figure 1**) and associated host species. Host species tree  
1191 was downloaded from [www.timetree.org](http://www.timetree.org). Papillomaviruses are linked to their host  
1192 phylogenies. Papillomaviruses associated with *Chiroptera* are highlighted  
1193 Yangochiroptera (orange) and Yinpterochiroptera (blue).

1194 (B) Procrustean Approach to Cophylogeny analysis based on the interaction network and  
1195 phylogenies shown in (A) supports that papillomaviruses coevolved with their hosts. The  
1196 observed best-fit Procrustean super-imposition (red dotted line line) lies outside of the  
1197 95% confidence interval (shaded area of the curves) of the distribution of network  
1198 randomizations in the null model.

1199 (C) As in (B) but using a subset of the interaction network and phylogenies (indicated by red  
1200 arrow in (A))

1201

1202 **Figure 3 CpG dinucleotide sequences are significantly depleted in papillomavirus**  
1203 **genomes**

1204 The observed vs. expected (O/E) ratios of each dinucleotide in the papillomavirus genomes  
1205 sequences shown in **Figure 2** were calculated using a custom wrapper around the CompSeq  
1206 program from the EMBOSS software suite. The red line indicates that the sequence is seen as  
1207 often as would be expected by chance.

1208

1209 **Figure 4 CpG content is significantly lower in papillomaviruses associated with**  
1210 **Yangochiroptera compared to related viruses**

1211 (A) A maximum likelihood phylogenetic tree is shown comparing the O/E ratios of CpG  
1212 dinucleotides. Viruses infecting Yangochiroptera (red), Yinpterochiroptera (green), and  
1213 related hosts (grey) are indicated.

1214 (B) Mean (+/- standard deviation) CpG observed vs. expected (O/E) ratios for each group of  
1215 viruses are compared using a one-way ANOVA with Tukey's posthoc test.

1216 (C) CpG observed vs. expected (O/E) ratios are compared to total GC content for each viral  
1217 genome in (A).

1218

1219 **Figure 5 Yangochiroptera papillomaviruses have a restricted codon usage**

1220 (A) Codon usage tables for each virus in Figure 2 were compared using the 'codcmp' program  
1221 from the EMBOSS software suite. Root-mean-square deviation (RMSD) values for each  
1222 pairwise comparison are plotted as Box-and-whisker plots with the outliers (colored  
1223 circles) identified using Tukey's method. Individual values are shown as a single black dot.

1224 (B) Amino-acid composition was calculated as described in materials and methods. Mean  
1225 values +/- standard deviation is plotted.

1226 (C) RSCU values for the indicated amino acid/codons were calculated and plotted as Box-  
1227 and-whisker plots with the outliers (colored circles) identified using Tukey's method. RSCU

1228 values for each amino acid were compared using a two-way ANOVA with Tukey's posthoc  
1229 test. Significance is indicated as shown in the legend.

1230

1231 **Figure 6 Yangochiroptera TLR9 is evolving under diversifying selection**

1232 (A) Structure of horse TLR9 in complex with agonistic DNA (PDB: 3WPC) (Ohto et al. 2015).

1233 Amino acids of interest are highlighted.

1234 (B) Maximum likelihood phylogenetic tree of mammalian TLR9 sequences clusters

1235 Yangochiroptera and Yinpterochiroptera separate from the mammalian TLR9. Red

1236 branches display evidence of episodic diversifying selection as identified by aBRSEL

1237 (Smith et al. 2015). Alignments show sequences of interest. The sequence logo is based

1238 on the alignment of 29 non-chiropteran TLR9 sequences. Numbering is based on the

1239 mouse TLR9. Residues indicated with \$ were identified as being selected using FEL.

1240 Residues highlighted with \* were previously identified as evolving under diversifying

1241 selection (Escalera-Zamudio et al. 2015), while residues with # were shown to be

1242 functionally important through site directed mutagenesis (Ohto et al. 2015).

1243

1244 **Figure 7 Yangochiroptera papillomaviruses depleted a TLR9 recognition motif from**  
1245 **their genomes**

1246 (A) The observed vs. expected (O/E) ratios of each N-CG-N tetramer in the Yangochiroptera

1247 papillomavirus genomes sequences were calculated using a custom wrapper around the

1248 CompSeq program from the EMBOSS software suite. Mean values +/- standard deviation

1249 are plotted.

1250 (B) The observed vs. expected (O/E) ratios of each N-CG-N tetramer in the different groups

1251 was calculated as in A. The proportion of these ratios are shown to provide a normalized

1252 view of tetramer depletion across papillomavirus genomes shown in Figure 2.



1253        **(C)** The Yang vs. Yin N-CG-N proportion (as in B) are plotted as brown dots and compared to  
1254            1000 randomly shuffled sequences (green violin) plots. Only ACGT is statistically  
1255            underrepresented in the Yangochiroptera.  
1256  
1257

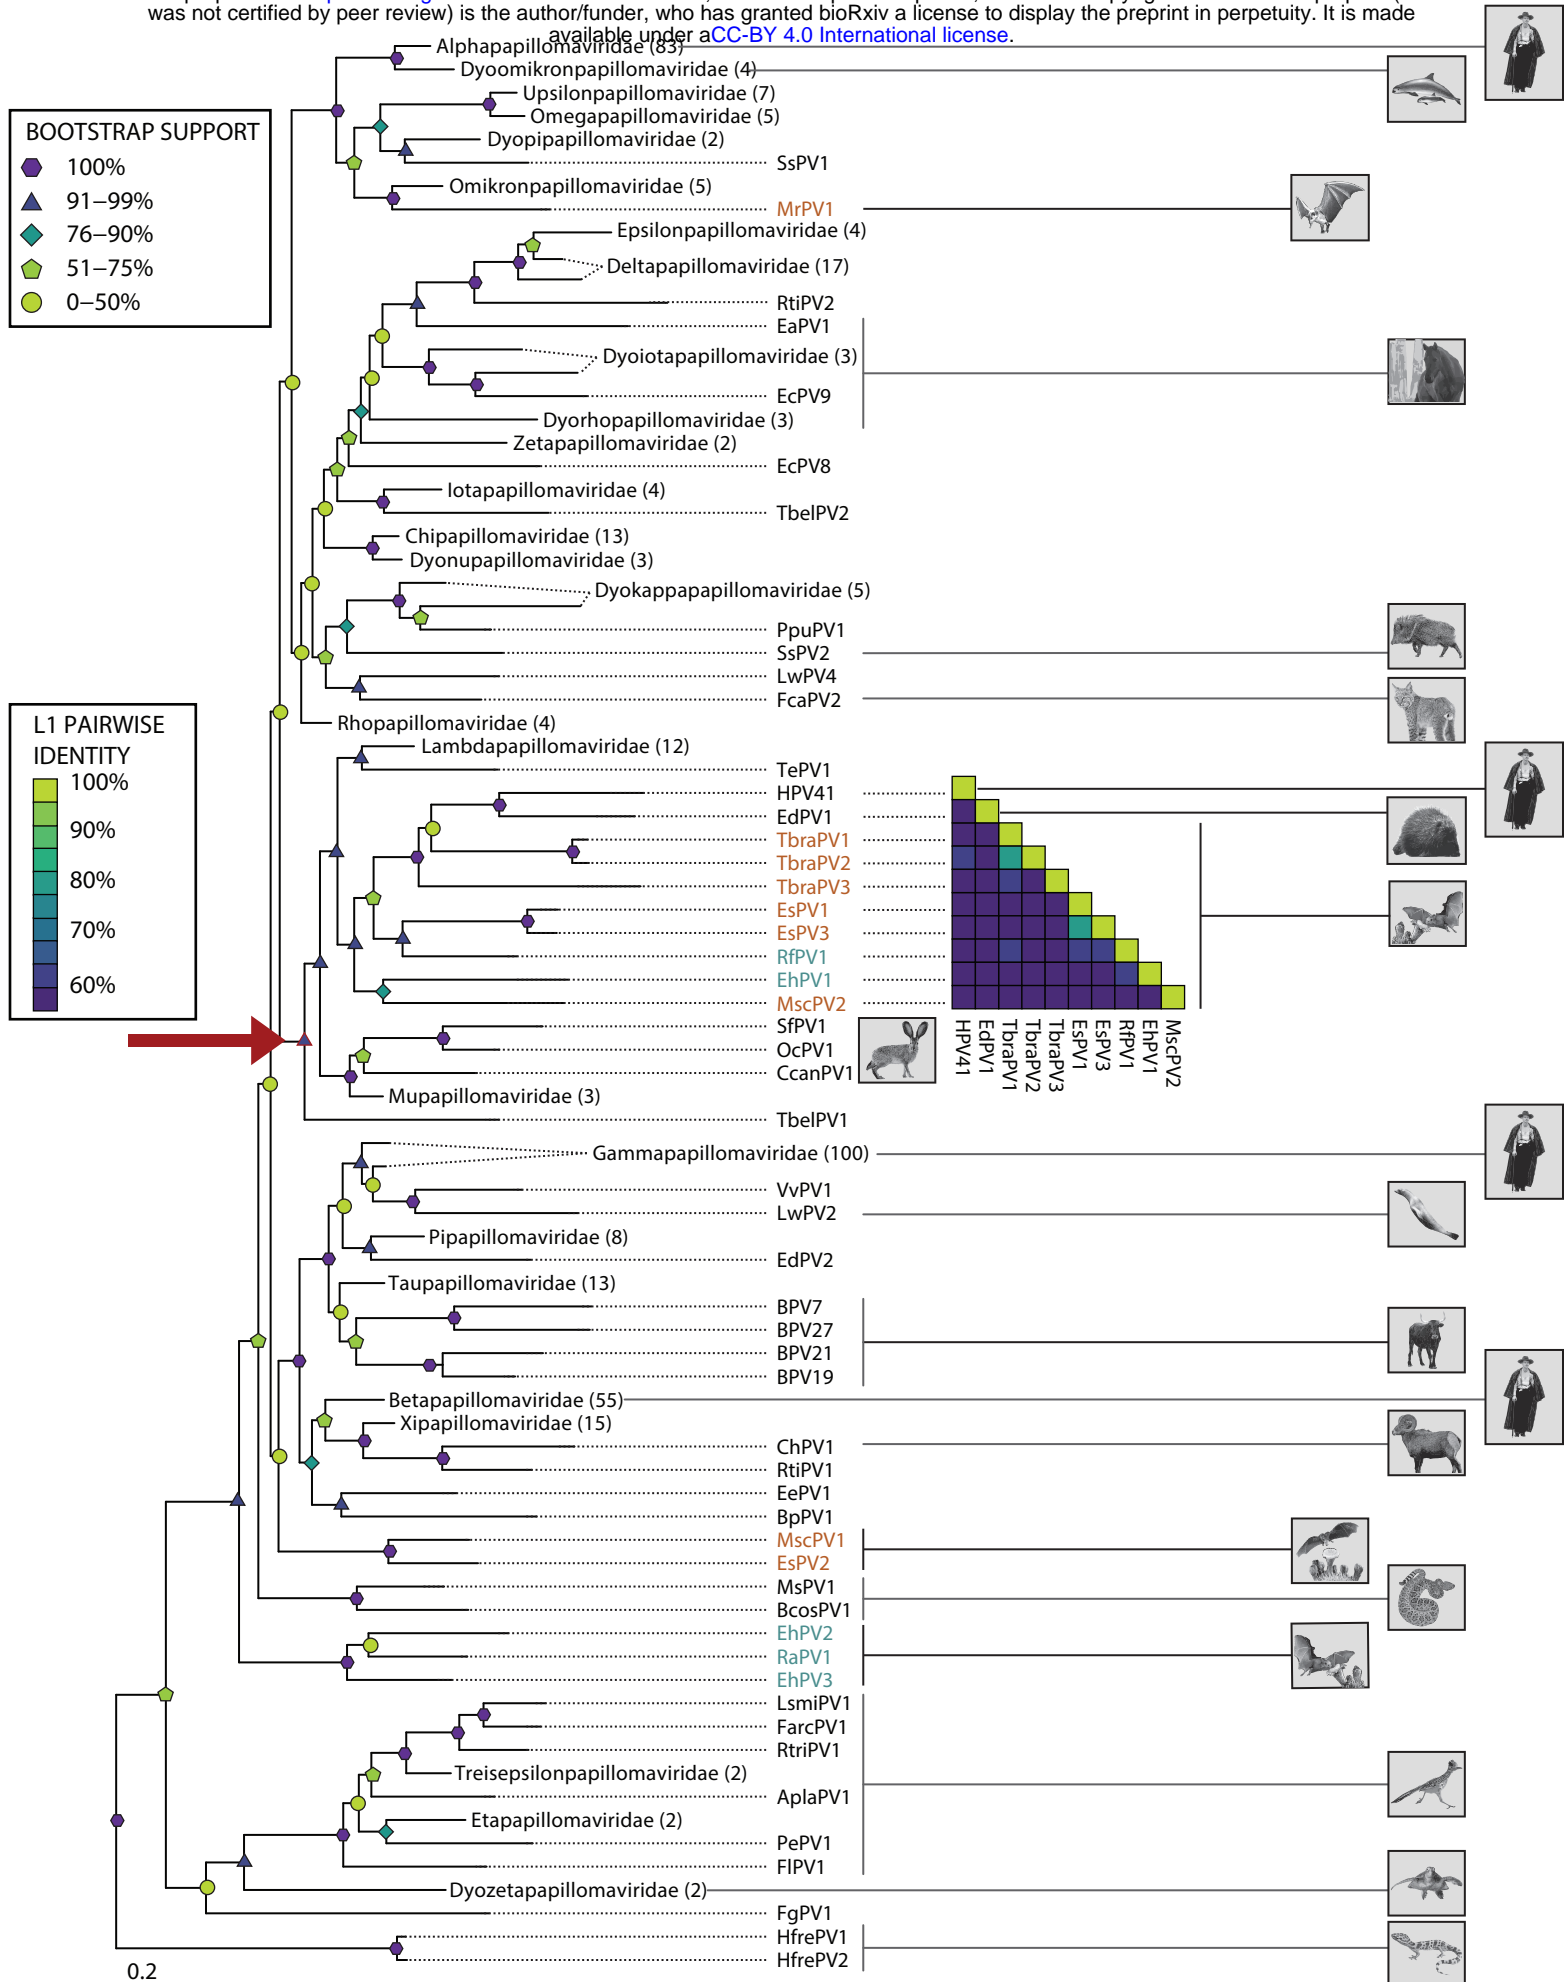

A.

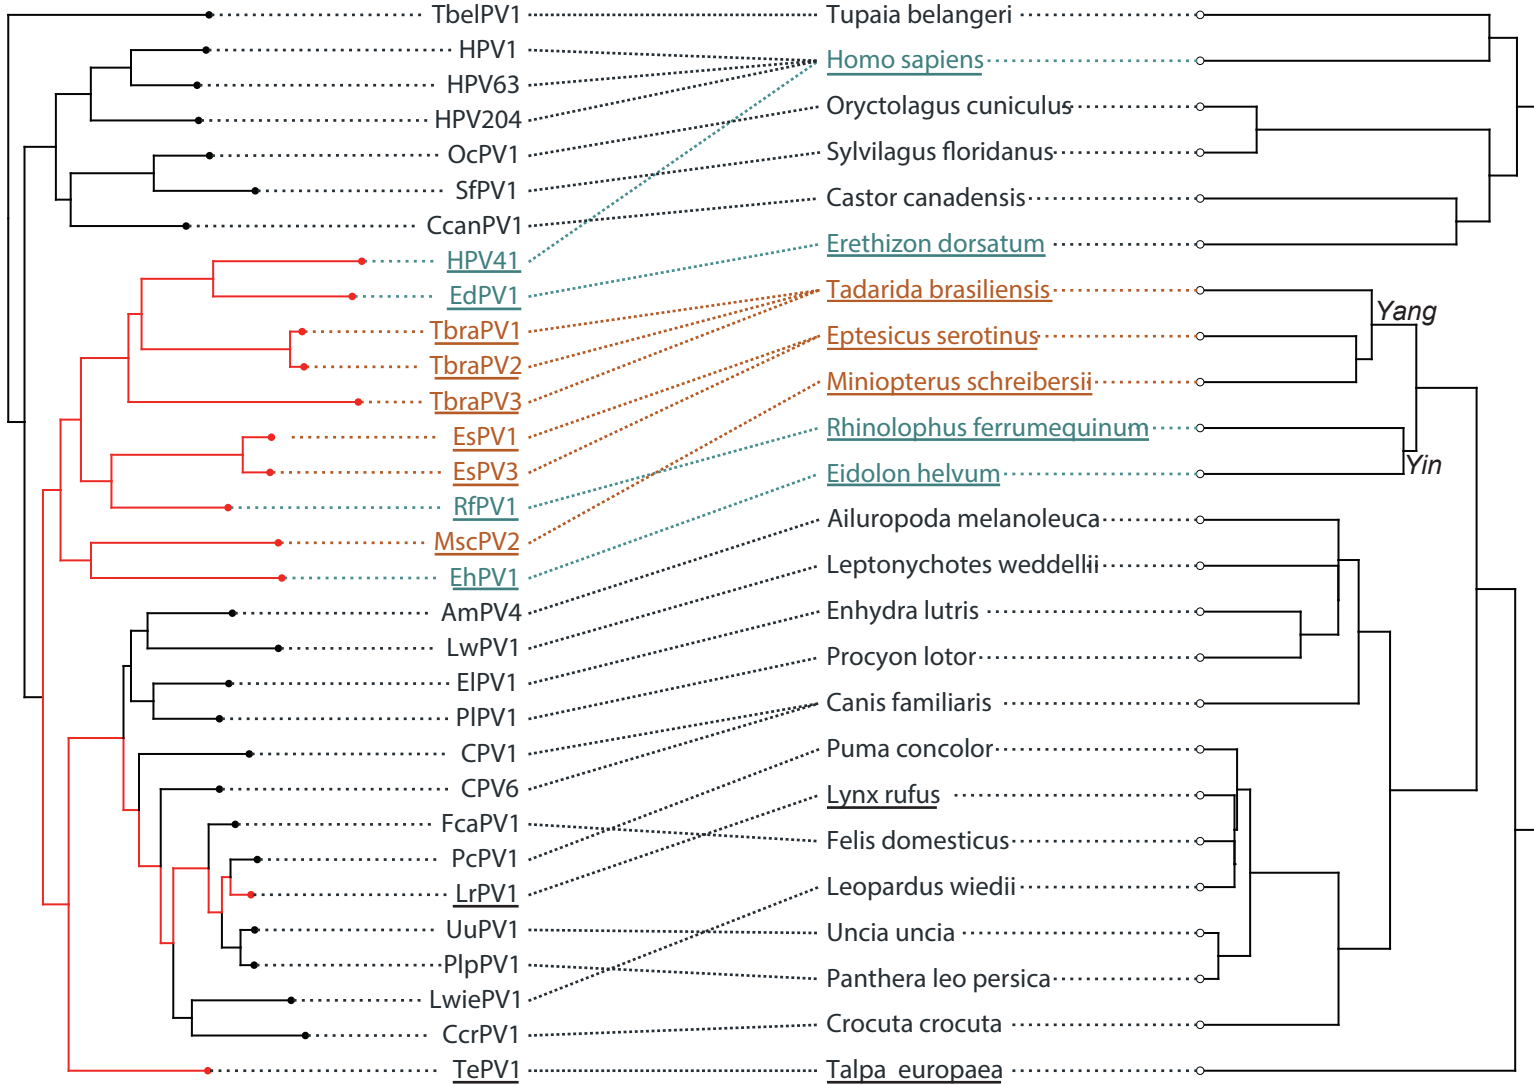

B.

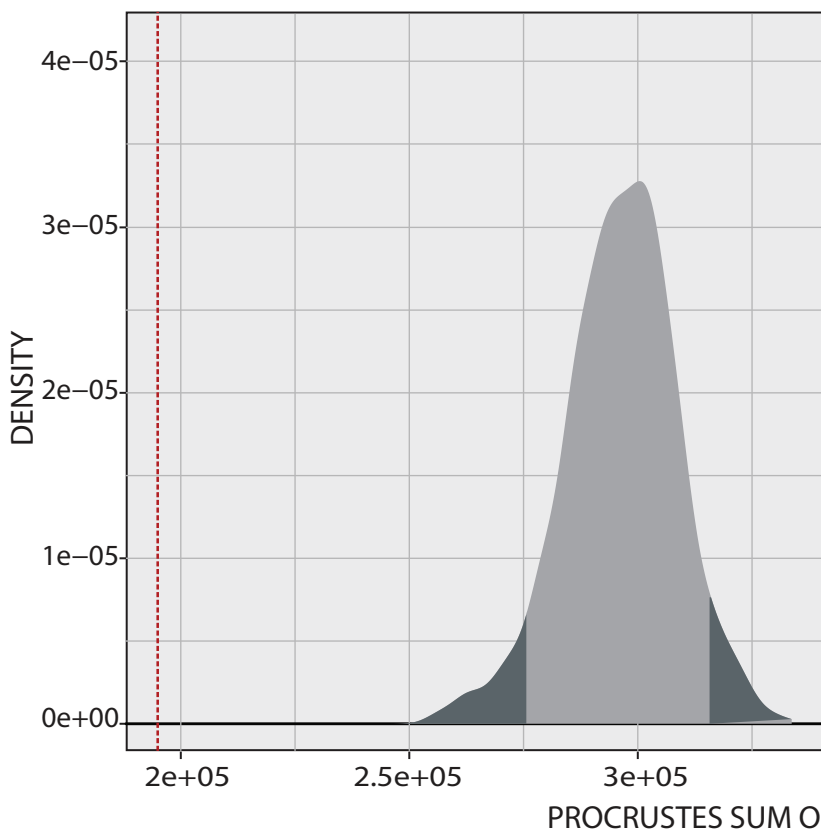

C.

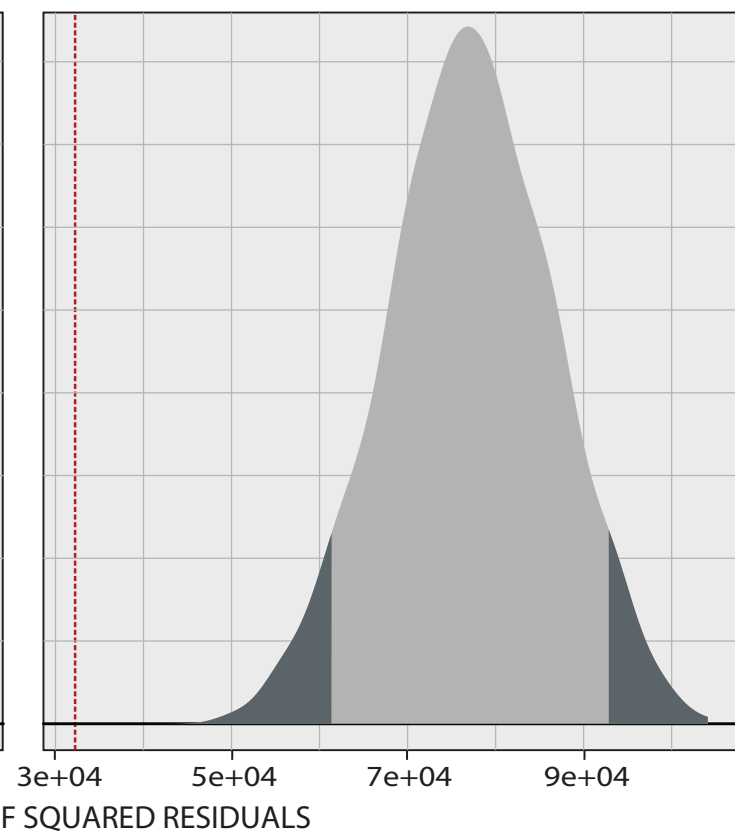

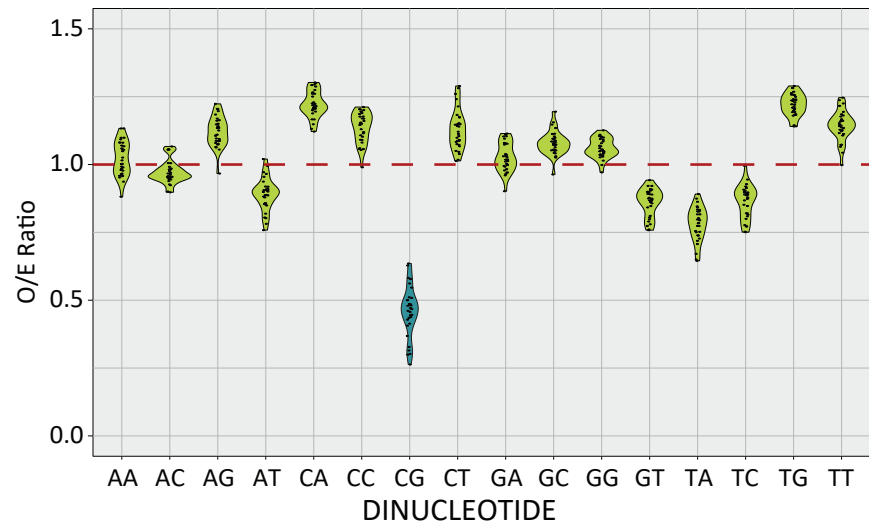

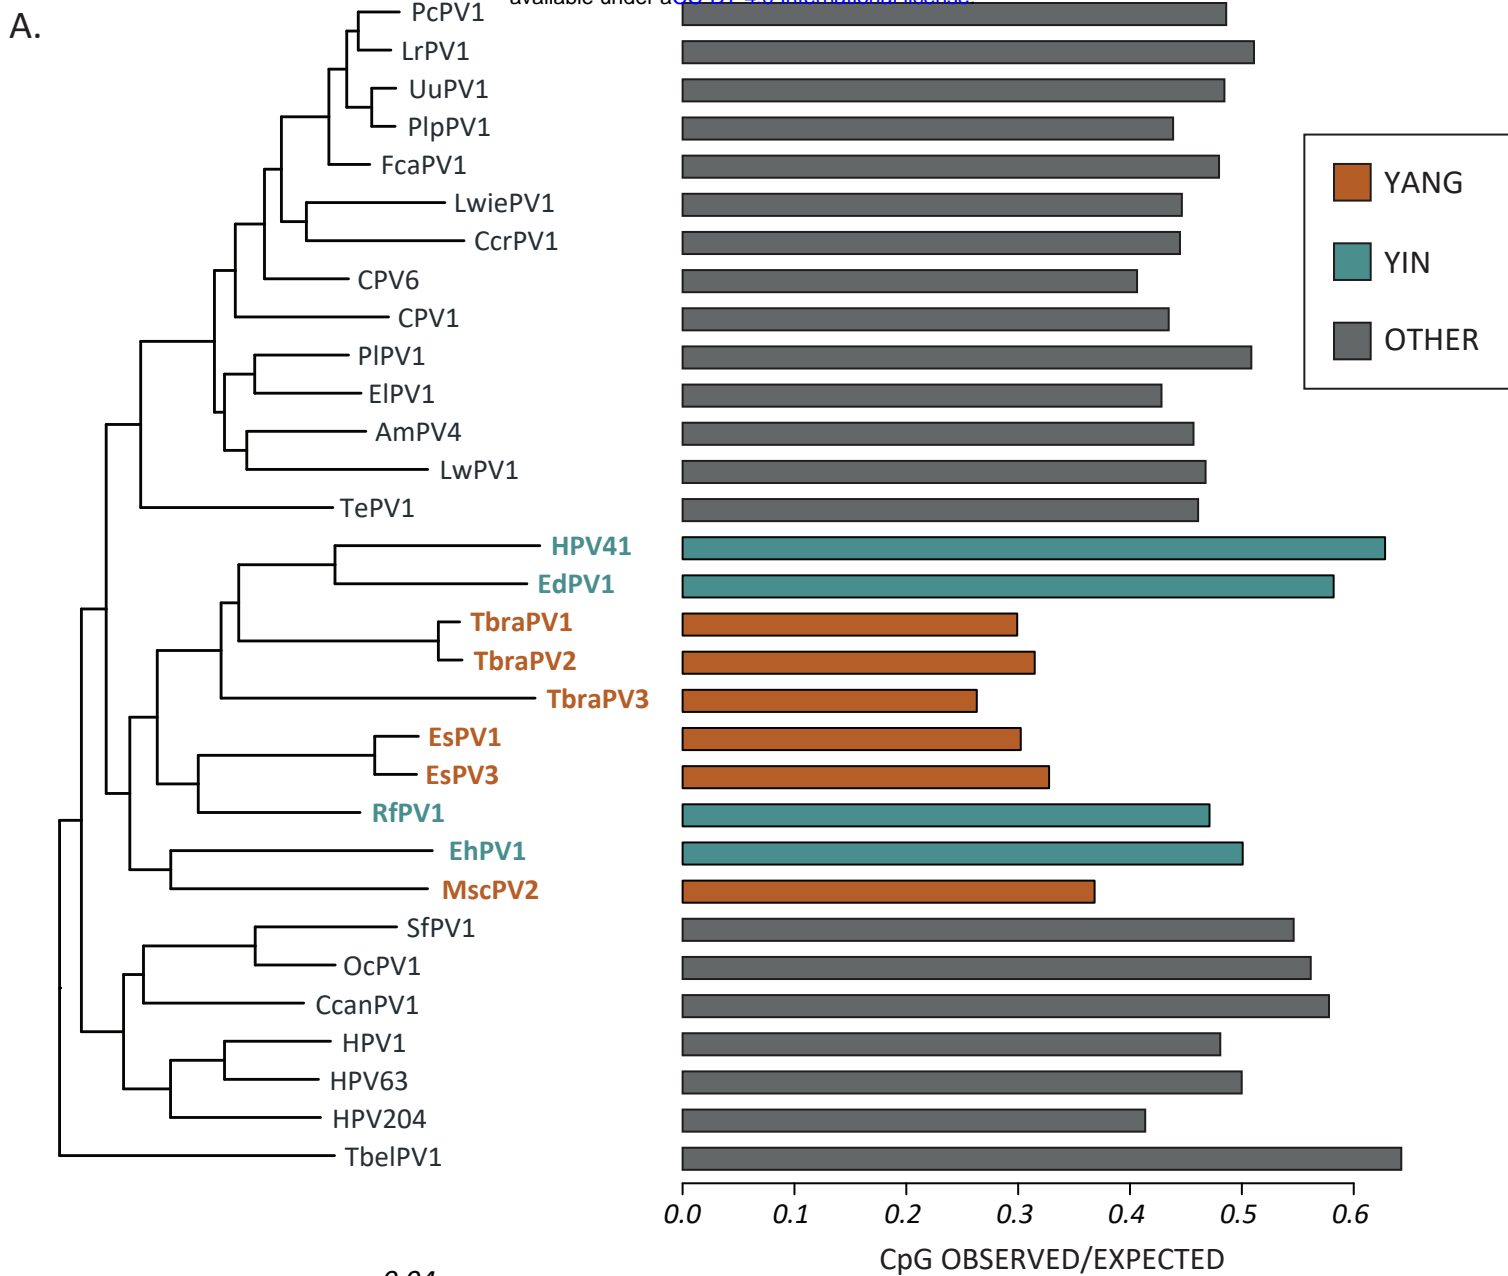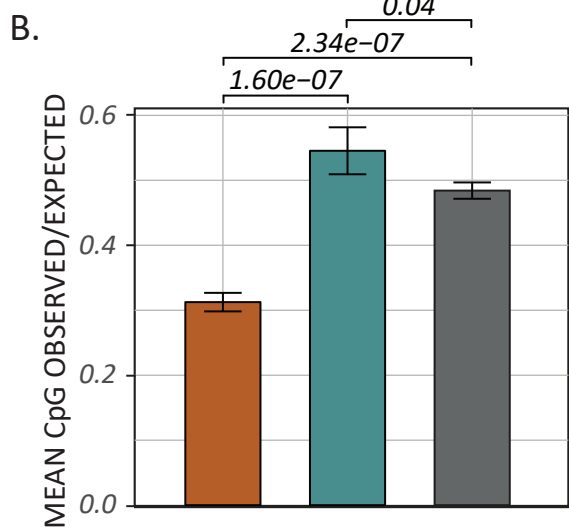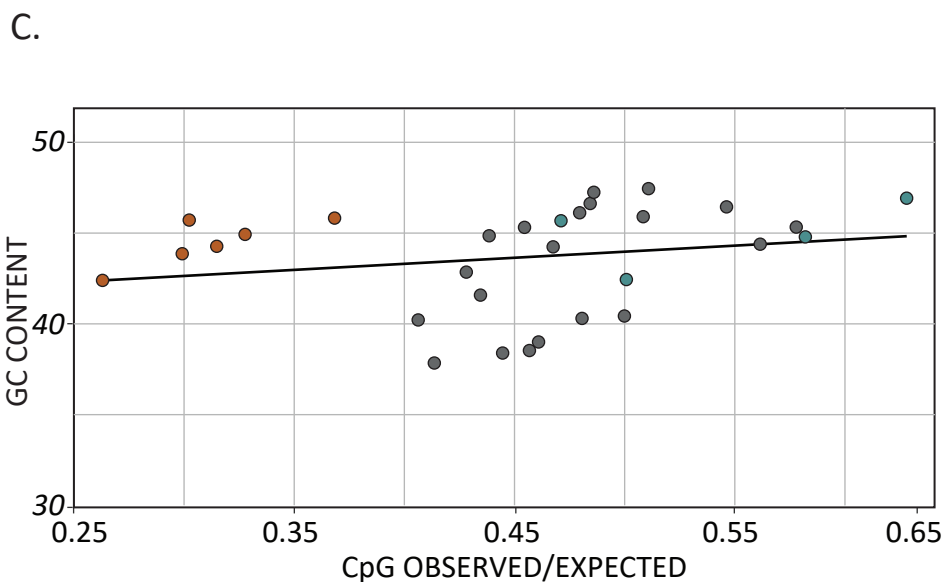

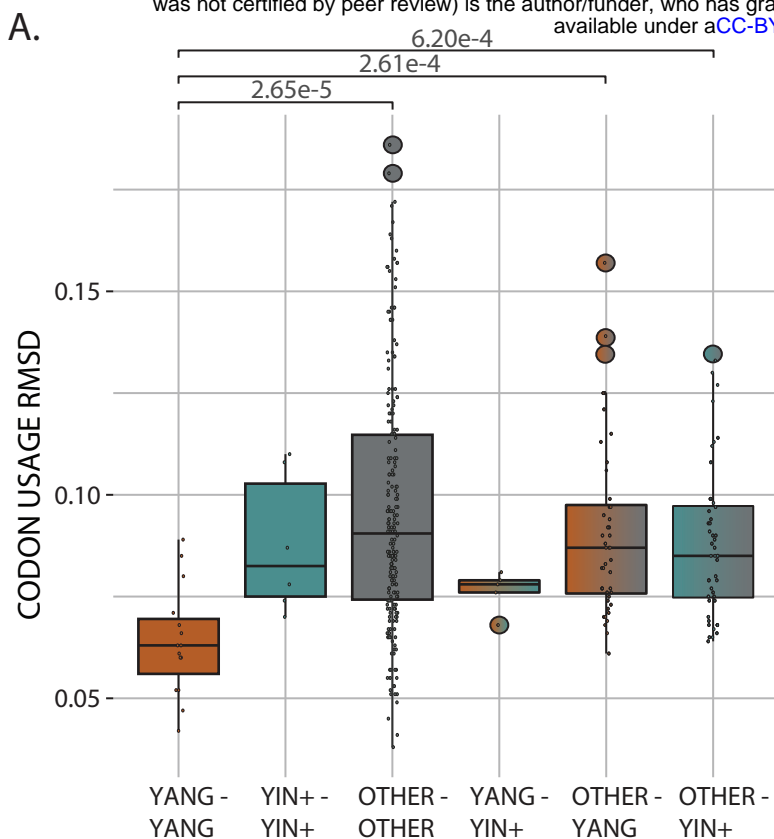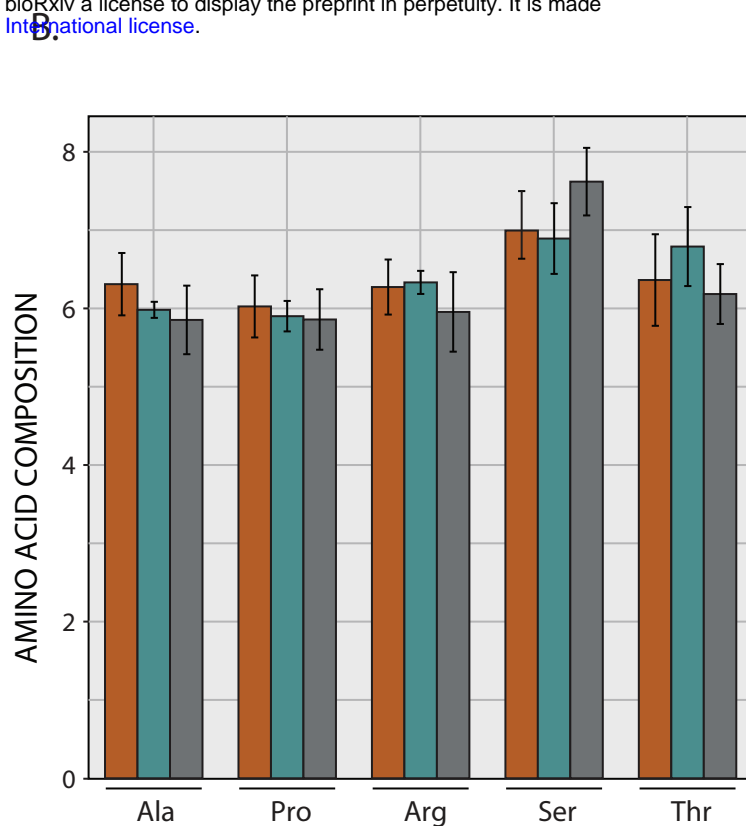

**C.**

|       |       |        |
|-------|-------|--------|
| *     | **    | ***    |
| <0.05 | <0.01 | <0.001 |

YANG    YIN    OTHER

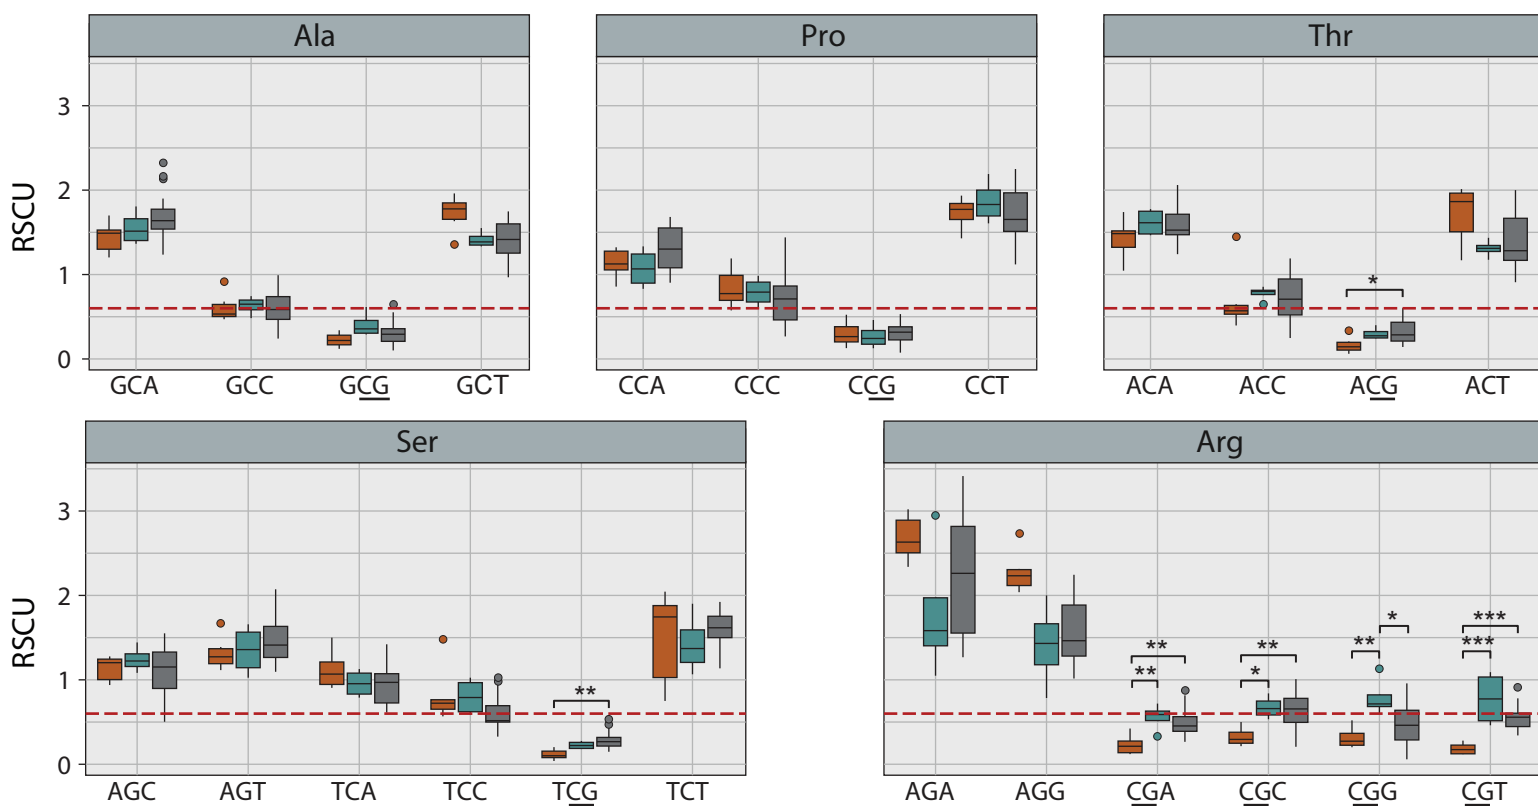

A

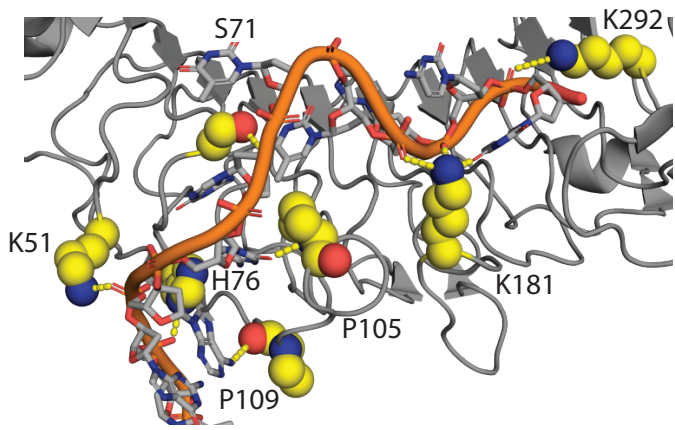

B

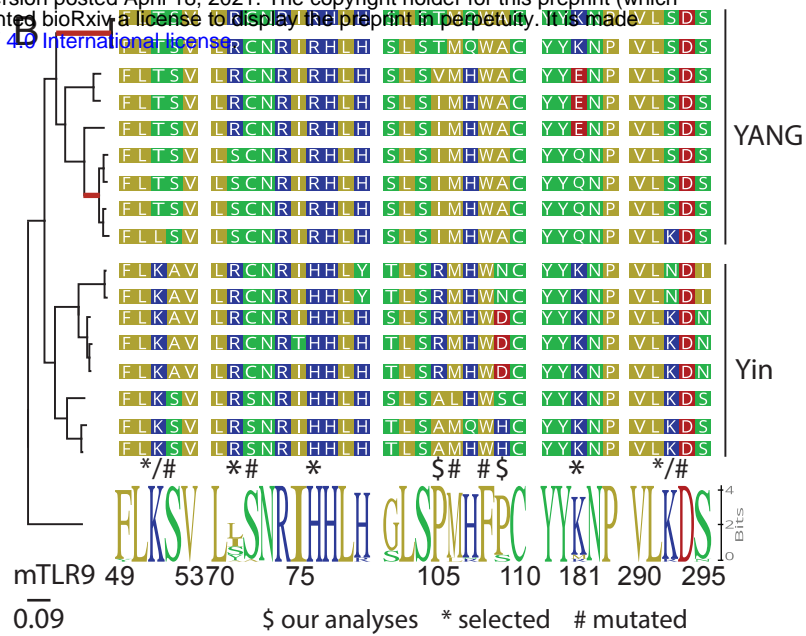

A.

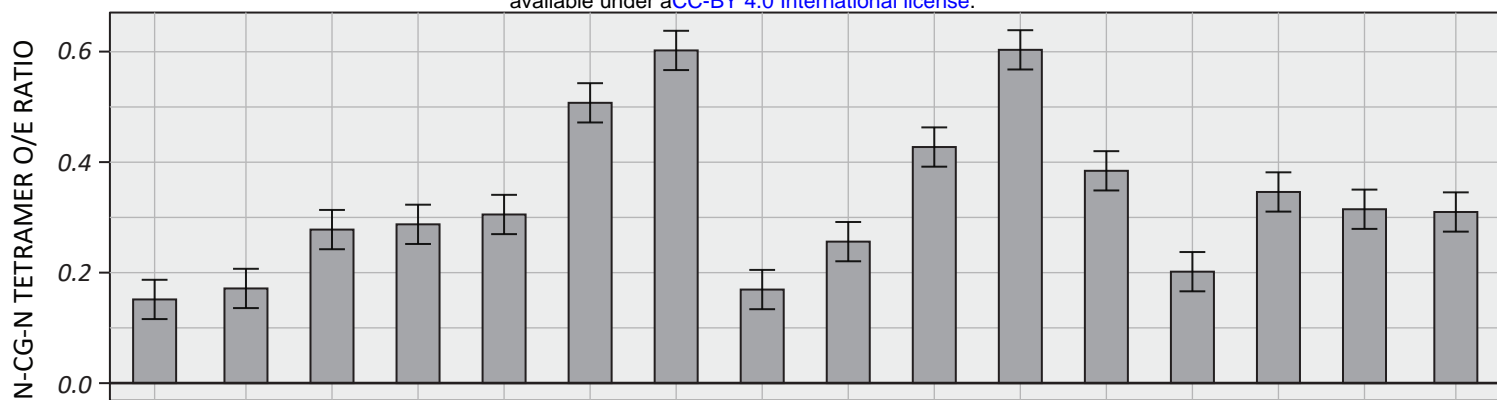

B.

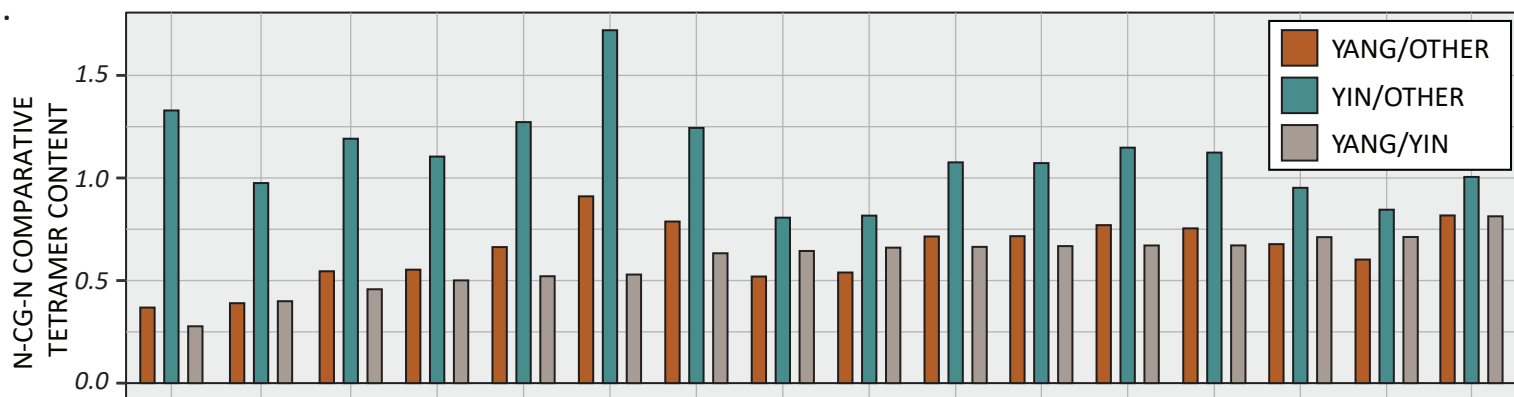

C.

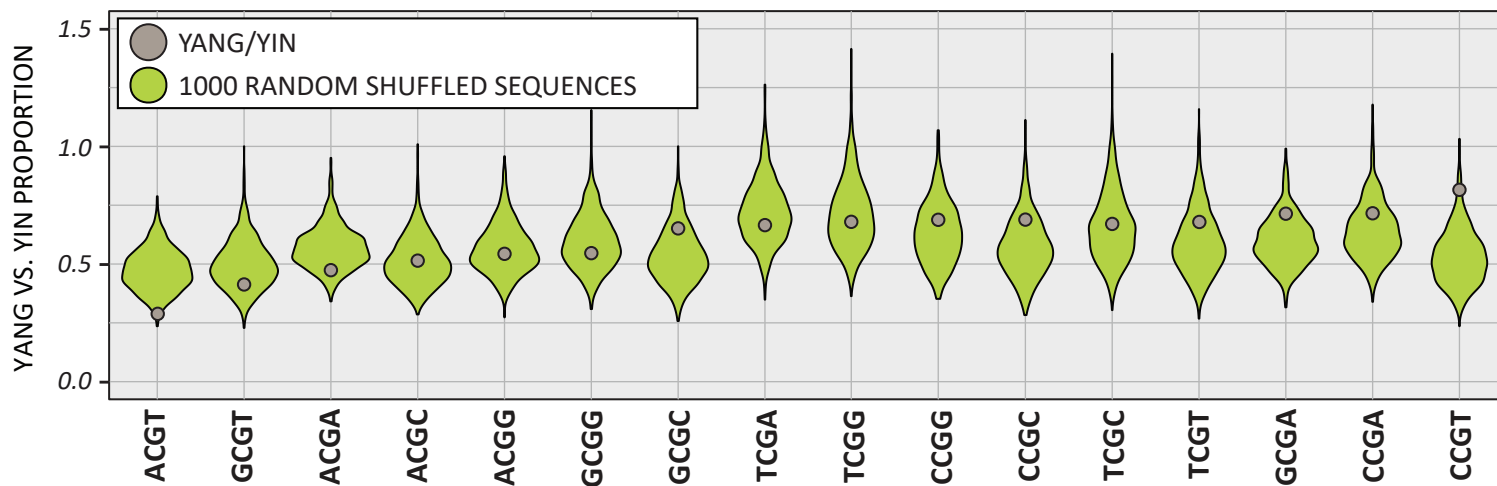

Source: https://www.biorxiv.org/content/10.1101/2021.04.17.440006v1.full.pdf
